# Supplementary material for: Achieving heat-resistant energetic compounds via silver-catalyzed one-pot cycloaddition of ethyl 2-isocyanoacetate and nitrogen-rich diazonium
Source: Royal Society of Chemistry journal article supplement (doi:10.1039/d3ta05041f), 2023-01-01
Supplement: d3ta05041f1.pdf [file d3ta05041f1.pdf]

## Electronic Supplementary Information

Achieving heat-resistant energetic compounds via silver-catalyzed one-pot  
cycloaddition of ethyl 2-isocyanoacetate and nitrogen-rich diazonium

Yaqun Dong,<sup>a</sup> Miao Li,<sup>a</sup> Guangbin Cheng,<sup>a</sup> Wei Huang,<sup>a</sup> Yuji Liu,<sup>\*a</sup> Chuan Xiao,<sup>\*b</sup>  
Yongxing Tang<sup>\*a</sup>

<sup>a</sup>*School of Chemistry and Chemical Engineering, Nanjing University of Science and Technology,  
Nanjing 210094, China. E-mail: yujiliu@njust.edu.cn; yongxing@njust.edu.cn*

<sup>b</sup>*China Northern Industries Group Co., Ltd. (NORINCO GROUP), Beijing 100089, China*

## Table of Contents

|     |                                                    |         |
|-----|----------------------------------------------------|---------|
| 1.  | General                                            | methods |
| S3  |                                                    |         |
| 2.  | Computational                                      | methods |
| S4  |                                                    |         |
| 3.  | Crystallographic                                   | data    |
| S5  |                                                    |         |
| 4.  | NMR                                                | spectra |
| S20 |                                                    |         |
| 5.  | The test of five-second (5s) delay exploding point |         |
| S32 |                                                    |         |
| 6.  | DSC plots                                          | S37     |
| 7.  | The device image of the 5 s bursting point         | S37     |

## 1. General methods

Chemical reagents were purchased from Aladdin and Bide Pharm in analytical grade and were used without further purification.  $^1\text{H}$  and  $^{13}\text{C}$  NMR spectra were recorded on a Bruker AVANCE III 300 MHz nuclear magnetic resonance spectrometer.  $\text{DMSO-}d_6$  was used as a locking solvent. The working frequencies for  $^1\text{H}$  and  $^{13}\text{C}$  are 300 MHz and 76 MHz, respectively. Chemical shifts were reported relative to tetramethylsilane as internal standard. Decomposition temperatures were obtained on a TA Instruments DSC25 differential scanning calorimeter at a heating rate of  $5\text{ }^\circ\text{C min}^{-1}$ . Infrared spectra (IR) were recorded on a PerkinElmer Spectrum BX FT-IR instrument equipped with an ATR unit at  $25\text{ }^\circ\text{C}$ . Elemental analyses of C/H/N were performed on a Vario EL III Analyzer. Impact and friction sensitivities were measured with a BAM fallhammer and friction tester. X-ray intensity data were collected on a Bruker D8 VENTURE PHOTON II system equipped with an Incoatecius 3.0 Microfocus sealed tube. The structures were solved and refined using Bruker SHELXTL Software Package. The data were refined against  $F^2$ . All non-hydrogen atoms were refined anisotropically. Hydrogen atoms were fixed to their parent atoms using a riding model and refined isotropically.

## 2. Computational methods

The gas-phase heats of formation were calculated based on isodesmic reactions (Scheme S1). The enthalpies of reaction were obtained by combining the MP2/6-311++G\*\* energy difference for the reactions, the scaled zero-point energies (ZPE), values of thermal correction (HT), and other thermal factors. The solid-state heats of formation were calculated with Trouton's rule according to equation 1 ( $T$  represents either melting point or decomposition temperature when no melting occurs prior to decomposition).<sup>1</sup>

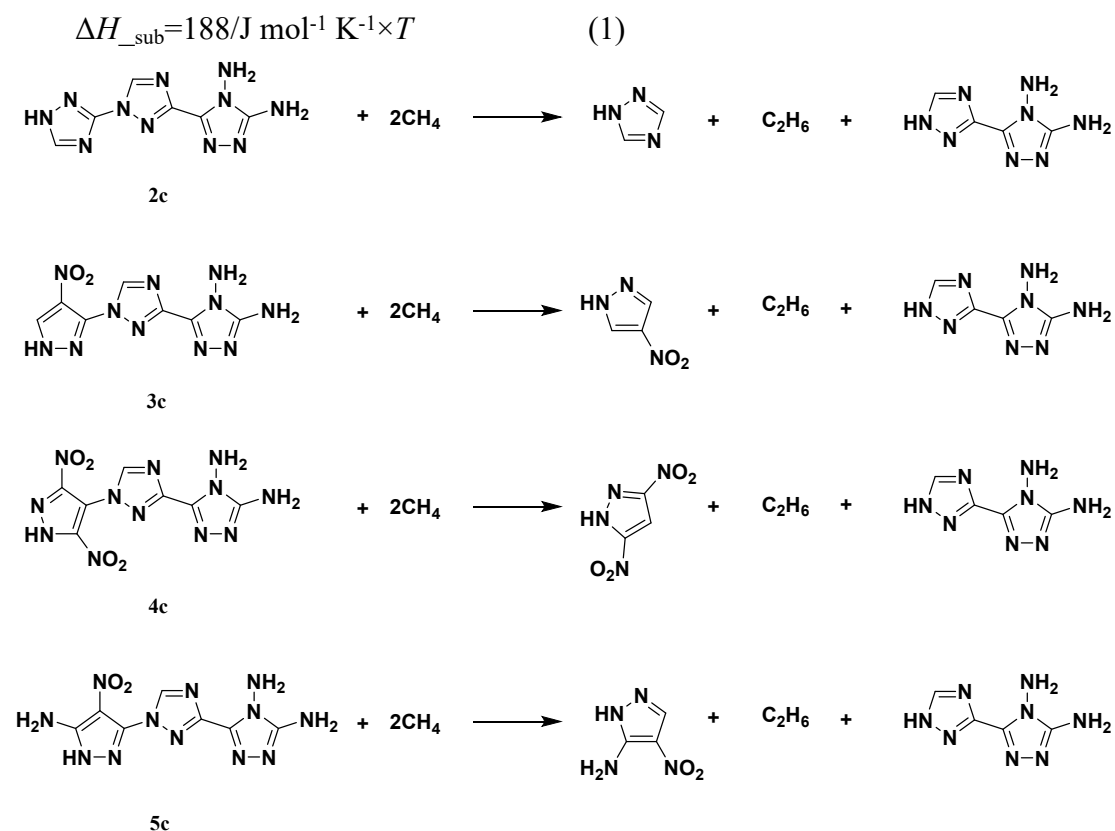

Scheme S1. Isodesmic reactions for 2c, 3c, 4c and 5c.

### 3. Crystal structure data

**Table S1.** Crystal data and structure refinement for **2c**·NO<sub>3</sub><sup>+</sup>·H<sub>2</sub>O and **3c**.

| compound                                                    | 2c·NO <sub>3</sub> <sup>+</sup> ·H <sub>2</sub> O             | 3c                                                           |
|-------------------------------------------------------------|---------------------------------------------------------------|--------------------------------------------------------------|
| <b>Empirical formula</b>                                    | C <sub>6</sub> H <sub>10</sub> N <sub>12</sub> O <sub>4</sub> | C <sub>7</sub> H <sub>7</sub> N <sub>11</sub> O <sub>2</sub> |
| <b>Formula weight</b>                                       | 314.26                                                        | 277.24                                                       |
| <b>Temperature [K]</b>                                      | 200(2)                                                        | 193.00                                                       |
| <b>Crystal system</b>                                       | monoclinic                                                    | monoclinic                                                   |
| <b>Space group</b>                                          | P2 <sub>1</sub> /m                                            | P2 <sub>1</sub> /c                                           |
| <b><i>a</i> [Å]</b>                                         | 7.7084(8)                                                     | 5.7986(5)                                                    |
| <b><i>b</i> [Å]</b>                                         | 6.2936(6)                                                     | 13.7372(14)                                                  |
| <b><i>c</i> [Å]</b>                                         | 13.2830(11)                                                   | 14.8998(10)                                                  |
| <b><i>α</i> [°]</b>                                         | 90                                                            | 90                                                           |
| <b><i>β</i> [°]</b>                                         | 90.277(7)                                                     | 100.940(5)                                                   |
| <b><i>γ</i> [°]</b>                                         | 90                                                            | 90                                                           |
| <b><i>V</i> [Å<sup>3</sup>]</b>                             | 644.40(11)                                                    | 1165.30(18)                                                  |
| <b><i>Z</i></b>                                             | 2                                                             | 4                                                            |
| <b><math>\rho_{\text{calcd}}</math> [Mg·m<sup>-3</sup>]</b> | 1.620                                                         | 1.580                                                        |
| <b><math>\mu</math>/mm<sup>-1</sup></b>                     | 1.191                                                         | 1.080                                                        |
| <b>F(000)</b>                                               | 324                                                           | 568.0                                                        |
| <b>Crystal size</b>                                         | 0.1×0.03×0.02                                                 | 0.13×0.11×0.1                                                |
| <b>Theta range for data collection</b>                      | 6.65 to 136.11 (0.83 Å)                                       | 8.83 to 137.462                                              |
| <b>index range</b>                                          | -9 ≤ <i>h</i> ≤ 8, -7 ≤ <i>k</i> ≤ 7, -15 ≤ <i>l</i> ≤ 15     | -6 ≤ <i>h</i> ≤ 6, -16 ≤ <i>k</i> ≤ 15, -16 ≤ <i>l</i> ≤ 17  |
| <b>reflections collected</b>                                | 4552                                                          | 7464                                                         |
| <b>independent reflections (R<sub>int</sub>)</b>            | 1425[R <sub>int</sub> =0.1285, R <sub>sigma</sub> =0.0733]    | 2129[R <sub>int</sub> =0.0803, R <sub>sigma</sub> =0.0613]   |
| <b>data/restraints/ parameters</b>                          | 1251/13/143                                                   | 2129/3/197                                                   |
| <b>GOF on F<sup>2</sup></b>                                 | 0.960                                                         | 0.956                                                        |
| <b>Final R indexes [I ≥ 2σ (I)]</b>                         | R <sub>1</sub> = 0.0823, wR <sub>2</sub> = 0.2139             | R <sub>1</sub> = 0.0475, wR <sub>2</sub> = 0.1141            |
| <b>Final R indexes [all data]</b>                           | R <sub>1</sub> = 0.1273, wR <sub>2</sub> = 0.2555             | R <sub>1</sub> = 0.0839, wR <sub>2</sub> = 0.1318            |
| <b>Largest diff. peak and hole [eÅ<sup>-3</sup>]</b>        | 0.28/-0.34                                                    | 0.19/-0.23                                                   |
| <b>CCDC number</b>                                          | 2289565                                                       | 2289566                                                      |

**Table S1.** Crystal data and structure refinement for **4c** and **5c**·NO<sub>3</sub><sup>+</sup>·H<sub>2</sub>O.

| compound                                                    | <b>4c</b>                                                    | <b>5c</b> ·NO <sub>3</sub> <sup>+</sup> ·H <sub>2</sub> O     |
|-------------------------------------------------------------|--------------------------------------------------------------|---------------------------------------------------------------|
| <b>Empirical formula</b>                                    | C <sub>7</sub> H <sub>6</sub> N <sub>12</sub> O <sub>4</sub> | C <sub>7</sub> H <sub>11</sub> N <sub>13</sub> O <sub>6</sub> |
| <b>Formula weight</b>                                       | 322.24                                                       | 373.29                                                        |
| <b>Temperature [K]</b>                                      | 273(2) K                                                     | 193.00                                                        |
| <b>Crystal system</b>                                       | monoclinic                                                   | triclinic                                                     |
| <b>Space group</b>                                          | P2 <sub>1</sub> /n                                           | P-1                                                           |
| <b><i>a</i> [Å]</b>                                         | 5.6440(8)                                                    | 7.1369(4)                                                     |
| <b><i>b</i> [Å]</b>                                         | 11.4599(13)                                                  | 8.9590(5)                                                     |
| <b><i>c</i> [Å]</b>                                         | 19.273(3)                                                    | 12.3118(8)                                                    |
| <b><i>α</i> [Å]</b>                                         | 90                                                           | 99.449(2)                                                     |
| <b><i>β</i> [Å]</b>                                         | 96.607(7)                                                    | 101.389(2)                                                    |
| <b><i>γ</i> [Å]</b>                                         | 90                                                           | 110.266(2)                                                    |
| <b>V [Å<sup>3</sup>]</b>                                    | 1238.3(3)                                                    | 700.40(7)                                                     |
| <b>Z</b>                                                    | 4                                                            | 2                                                             |
| <b><math>\rho_{\text{calcd}}</math> [Mg·m<sup>-3</sup>]</b> | 1.729                                                        | 1.770                                                         |
| <b><math>\mu</math>/mm<sup>-1</sup></b>                     | 1.268                                                        | 0.153                                                         |
| <b>F(000)</b>                                               | 656                                                          | 384.0                                                         |
| <b>Crystal size</b>                                         | 0.220 × 0.200 × 0.180                                        | 0.13 × 0.11 × 0.1                                             |
| <b>Theta range for data collection</b>                      | 4.497 to 66.881 (0.83 Å)                                     | 5.01 to 55.162                                                |
| <b>index range</b>                                          | -5 ≤ <i>h</i> ≤ 6, -13 ≤ <i>k</i> ≤ 13, -22 ≤ <i>l</i> ≤ 22  | -8 ≤ <i>h</i> ≤ 9, -11 ≤ <i>k</i> ≤ 11, -15 ≤ <i>l</i> ≤ 15   |
| <b>reflections collected</b>                                | 10577                                                        | 15036                                                         |
| <b>independent reflections (R<sub>int</sub>)</b>            | 2170 [R(int) = 0.1287]                                       | 3223 [R <sub>int</sub> = 0.0674, R <sub>sigma</sub> = 0.0473] |
| <b>data/restraints/ parameters</b>                          | 2170/0/208                                                   | 3223/0/239                                                    |
| <b>GOF on F<sup>2</sup></b>                                 | 1.081                                                        | 1.045                                                         |
| <b>Final R indexes [I ≥ 2σ(I)]</b>                          | R <sub>1</sub> = 0.0683, wR <sub>2</sub> = 0.1892            | R <sub>1</sub> = 0.0481, wR <sub>2</sub> = 0.1149             |
| <b>Final R indexes [all data]</b>                           | R <sub>1</sub> = 0.0855, wR <sub>2</sub> = 0.2052            | R <sub>1</sub> = 0.0661, wR <sub>2</sub> = 0.1325             |
| <b>Largest diff. peak and hole [eÅ<sup>-3</sup>]</b>        | 0.426 and -0.346                                             | 0.36 and -0.46                                                |
| <b>CCDC number</b>                                          | 2289564                                                      | 2289562                                                       |

**Table S3.** Fractional Atomic Coordinates ( $\times 10^4$ ) and Equivalent Isotropic Displacement Parameters ( $\text{\AA}^2 \times 10^3$ ) for  $2\text{c}^- \cdot \text{NO}_3^+ \cdot \text{H}_2\text{O}$ . Ueq is defined as 1/3 of the trace of the orthogonalised Uij tensor.

|      | x           | y        | z          | U(eq)      |
|------|-------------|----------|------------|------------|
| N1   | 0.1975(9)   | 0.250000 | 0.4621(5)  | 0.0510(16) |
| C4   | 0.1382(10)  | 0.250000 | 0.3672(5)  | 0.0477(18) |
| N3   | 0.0513(9)   | 0.250000 | 0.5162(5)  | 0.0478(15) |
| N12  | 0.2028(9)   | 0.250000 | 0.6726(5)  | 0.0521(17) |
| N4   | -0.0382(10) | 0.250000 | 0.3596(5)  | 0.0526(16) |
| C3   | -0.0865(11) | 0.250000 | 0.4542(6)  | 0.0491(18) |
| H3   | -0.203702   | 0.250000 | 0.475873   | 0.059      |
| C6   | 0.2544(11)  | 0.250000 | 0.2834(5)  | 0.0500(19) |
| N10  | 0.5380(11)  | 0.250000 | 0.3830(5)  | 0.070(2)   |
| H10A | 0.521296    | 0.135840 | 0.424210   | 0.104      |
| H10B | 0.539705    | 0.375827 | 0.417126   | 0.104      |
| C1   | 0.0575(11)  | 0.250000 | 0.6235(6)  | 0.0475(17) |
| N8   | 0.4359(10)  | 0.250000 | 0.2947(5)  | 0.0537(17) |
| N2   | 0.1467(9)   | 0.250000 | 0.7695(5)  | 0.0562(18) |
| H2A  | 0.214346    | 0.250000 | 0.823053   | 0.067      |
| N11  | -0.0870(9)  | 0.250000 | 0.6772(5)  | 0.0513(17) |
| C2   | -0.0224(12) | 0.250000 | 0.7710(6)  | 0.0522(19) |
| H2   | -0.090451   | 0.250000 | 0.830471   | 0.063      |
| O5   | 0.5590(9)   | 0.250000 | 0.5920(4)  | 0.0699(18) |
| H5A  | 0.466(7)    | 0.250000 | 0.626(6)   | 0.105      |
| H5B  | 0.639(9)    | 0.250000 | 0.636(6)   | 0.105      |
| C7   | 0.5021(11)  | 0.250000 | 0.2015(6)  | 0.052(2)   |
| N9   | 0.5404(10)  | 0.250000 | -0.0994(5) | 0.0567(18) |
| N7   | 0.6744(10)  | 0.250000 | 0.1834(5)  | 0.0566(17) |
| H7A  | 0.718(7)    | 0.250000 | 0.121(2)   | 0.085      |
| H7B  | 0.755(6)    | 0.27(6)  | 0.231(4)   | 0.085      |
| N5   | 0.2153(10)  | 0.250000 | 0.1877(6)  | 0.0600(18) |
| O4   | 0.5612(9)   | 0.250000 | -0.1912(4) | 0.0738(19) |
| N6   | 0.3711(9)   | 0.250000 | 0.1391(5)  | 0.0555(18) |
| H6   | 0.381798    | 0.250000 | 0.073147   | 0.067      |
| O2   | 0.3859(9)   | 0.250000 | -0.0669(5) | 0.0723(19) |
| O3   | 0.6634(10)  | 0.250000 | -0.0392(5) | 0.078(2)   |

**Table S4.** Bond lengths [Å] and angles [°] for **2c<sup>-</sup>·NO<sub>3</sub><sup>+</sup>·H<sub>2</sub>O**.

|               |           |                   |          |
|---------------|-----------|-------------------|----------|
| <b>N1–C4</b>  | 1.339(10) | <b>C4–N1–N3</b>   | 102.8(6) |
| <b>N1–N3</b>  | 1.340(9)  | <b>N1–C4–N4</b>   | 113.9(7) |
| <b>C4–N4</b>  | 1.364(11) | <b>N1–C4–C6</b>   | 121.3(7) |
| <b>C4–C6</b>  | 1.431(10) | <b>N4–C4–C6</b>   | 124.8(7) |
| <b>N3–C3</b>  | 1.341(10) | <b>N1–N3–C3</b>   | 109.6(6) |
| <b>N3–C1</b>  | 1.426(9)  | <b>N1–N3–C1</b>   | 120.8(6) |
| <b>N12–C1</b> | 1.293(11) | <b>C3–N3–C1</b>   | 129.6(7) |
| <b>N12–N2</b> | 1.360(9)  | <b>C1–N12–N2</b>  | 101.4(6) |
| <b>N4–C3</b>  | 1.311(11) | <b>C3–N4–C4</b>   | 102.5(7) |
| <b>C6–N5</b>  | 1.306(10) | <b>N4–C3–N3</b>   | 111.2(7) |
| <b>C6–N8</b>  | 1.406(11) | <b>N5–C6–N8</b>   | 109.2(7) |
| <b>N10–N8</b> | 1.410(9)  | <b>N5–C6–C4</b>   | 127.9(8) |
| <b>C1–N11</b> | 1.325(11) | <b>N8–C6–C4</b>   | 122.9(7) |
| <b>N8–C7</b>  | 1.341(10) | <b>N12–C1–N11</b> | 117.2(6) |
| <b>N2–C2</b>  | 1.304(11) | <b>N12–C1–N3</b>  | 121.9(7) |
| <b>N11–C2</b> | 1.340(10) | <b>N11–C1–N3</b>  | 120.9(7) |
| <b>C7–N6</b>  | 1.304(11) | <b>C7–N8–C6</b>   | 106.6(7) |
| <b>C7–N7</b>  | 1.351(12) | <b>C7–N8–N10</b>  | 123.7(7) |
| <b>N9–O4</b>  | 1.230(9)  | <b>C6–N8–N10</b>  | 129.8(7) |
| <b>N9–O3</b>  | 1.238(10) | <b>C2–N2–N12</b>  | 109.7(7) |
| <b>N9–O2</b>  | 1.269(10) | <b>C1–N11–C2</b>  | 101.0(7) |
| <b>N5–N6</b>  | 1.367(10) | <b>N2–C2–N11</b>  | 110.6(7) |
|               |           | <b>N6–C7–N8</b>   | 106.8(7) |
|               |           | <b>N6–C7–N7</b>   | 130.3(7) |
|               |           | <b>N8–C7–N7</b>   | 122.9(8) |
|               |           | <b>O4–N9–O3</b>   | 122.5(8) |
|               |           | <b>O4–N9–O2</b>   | 117.7(8) |
|               |           | <b>O3–N9–O2</b>   | 119.8(7) |
|               |           | <b>C6–N5–N6</b>   | 105.1(7) |
|               |           | <b>C7–N6–N5</b>   | 112.3(6) |

**Table S5.** Anisotropic displacement parameters ( $\text{Å}^2 \times 10^3$ ) for **2c<sup>-</sup>·NO<sub>3</sub><sup>+</sup>·H<sub>2</sub>O**. The anisotropic displacement factor exponent takes the form:  $-2\pi^2 [h^2 a^{*2} U^{11} + \dots + 2 h k a^* b^* U^{12}]$ .

| <b>Atom</b> | <b>U<sup>11</sup></b> | <b>U<sup>22</sup></b> | <b>U<sup>33</sup></b> | <b>U<sup>23</sup></b> | <b>U<sup>13</sup></b> | <b>U<sup>12</sup></b> |
|-------------|-----------------------|-----------------------|-----------------------|-----------------------|-----------------------|-----------------------|
| <b>N1</b>   | 0.049(4)              | 0.067(4)              | 0.037(3)              | 0.000                 | 0.010(3)              | 0.000                 |
| <b>C4</b>   | 0.055(5)              | 0.056(5)              | 0.032(3)              | 0.000                 | 0.005(3)              | 0.000                 |
| <b>N3</b>   | 0.049(4)              | 0.054(4)              | 0.040(3)              | 0.000                 | 0.000(3)              | 0.000                 |
| <b>N12</b>  | 0.063(4)              | 0.062(4)              | 0.031(3)              | 0.000                 | 0.001(3)              | 0.000                 |
| <b>N4</b>   | 0.062(4)              | 0.055(4)              | 0.042(3)              | 0.000                 | 0.000(3)              | 0.000                 |
| <b>C3</b>   | 0.051(5)              | 0.056(4)              | 0.040(4)              | 0.000                 | -0.003(3)             | 0.000                 |
| <b>C6</b>   | 0.060(5)              | 0.058(5)              | 0.032(4)              | 0.000                 | 0.003(3)              | 0.000                 |



|            |          |          |          |       |           |       |
|------------|----------|----------|----------|-------|-----------|-------|
| <b>N10</b> | 0.061(4) | 0.118(6) | 0.029(3) | 0.000 | -0.009(3) | 0.000 |
| <b>C1</b>  | 0.055(5) | 0.047(4) | 0.040(4) | 0.000 | -0.006(4) | 0.000 |
| <b>N8</b>  | 0.060(4) | 0.073(4) | 0.028(3) | 0.000 | 0.000(3)  | 0.000 |
| <b>N2</b>  | 0.061(5) | 0.072(5) | 0.036(3) | 0.000 | 0.003(3)  | 0.000 |
| <b>N11</b> | 0.053(4) | 0.058(4) | 0.042(3) | 0.000 | -0.001(3) | 0.000 |
| <b>C2</b>  | 0.062(5) | 0.060(5) | 0.035(3) | 0.000 | 0.002(3)  | 0.000 |
| <b>O5</b>  | 0.054(3) | 0.120(5) | 0.035(3) | 0.000 | -0.001(3) | 0.000 |
| <b>C7</b>  | 0.067(5) | 0.055(5) | 0.033(4) | 0.000 | 0.005(4)  | 0.000 |
| <b>N9</b>  | 0.062(5) | 0.066(4) | 0.042(4) | 0.000 | 0.000(3)  | 0.000 |
| <b>N7</b>  | 0.057(4) | 0.079(5) | 0.033(3) | 0.000 | 0.001(3)  | 0.000 |
| <b>N5</b>  | 0.055(4) | 0.078(5) | 0.047(4) | 0.000 | 0.002(3)  | 0.000 |
| <b>O4</b>  | 0.078(4) | 0.114(6) | 0.029(3) | 0.000 | 0.000(3)  | 0.000 |
| <b>N6</b>  | 0.057(4) | 0.073(5) | 0.036(3) | 0.000 | 0.004(3)  | 0.000 |
| <b>O2</b>  | 0.068(4) | 0.105(5) | 0.044(3) | 0.000 | 0.004(3)  | 0.000 |
| <b>O3</b>  | 0.074(4) | 0.113(6) | 0.046(3) | 0.000 | -0.007(3) | 0.000 |

**Table S6.** Torsion angles [°] for **2c<sup>-</sup>·NO<sub>3</sub><sup>+</sup>·H<sub>2</sub>O**.

|                              |           |                              |            |
|------------------------------|-----------|------------------------------|------------|
| <b>C(4)-N(1)-N(3)-C(1)</b>   | 180.0(1)  | <b>N(10)-N(8)-C(6)-N(5)</b>  | 180.00(1)  |
| <b>C(4)-N(1)-N(3)-C(3)</b>   | 0(1)      | <b>N(10)-N(8)-C(6)-C(4)</b>  | 0.00(1)    |
| <b>N(3)-N(1)-C(4)-N(4)</b>   | 0(1)      | <b>C(7)-N(8)-C(6)-N(5)</b>   | 0.00(1)    |
| <b>N(3)-N(1)-C(4)-C(6)</b>   | -180.0(1) | <b>C(7)-N(8)-C(6)-C(4)</b>   | -180.00(1) |
| <b>C(2)-N(2)-N(12)-C(1)</b>  | -149.9(2) | <b>N(1)-N(8)-C(7)-N(6)</b>   | -180.00(1) |
| <b>N(12)-N(2)-C(2)-N(11)</b> | 0.00(1)   | <b>N(10)-N(8)-C(7)-N(7)</b>  | 0.00(1)    |
| <b>N(1)-N(3)-C(1)-N(11)</b>  | 180.00(1) | <b>C(6)-N(8)-C(7)-N(6)</b>   | 0.00(1)    |
| <b>N(1)-N(3)-C(1)-N(12)</b>  | 0.00(1)   | <b>C(6)-N(8)-C(7)-N(7)</b>   | 180.00(1)  |
| <b>C(3)-N(3)-C(1)-N(11)</b>  | 0.00(1)   | <b>C(2)-N(11)-C(1)-N(3)</b>  | 180.00(1)  |
| <b>C(4)-N(4)-C(3)-N(3)</b>   | 180.00(1) | <b>C(2)-N(11)-C(1)-N(12)</b> | 0.00(1)    |
| <b>C(3)-N(4)-C(4)-N(1)</b>   | 0.00(1)   | <b>C(1)-N(11)-C(2)-N(2)</b>  | 0.00(1)    |
| <b>C(3)-N(4)-C(4)-C(6)</b>   | 180.00(1) | <b>N(2)-N(12)-C(1)-N(3)</b>  | 180.00(1)  |
| <b>C(6)-N(5)-N(6)-C(7)</b>   | 0.00(1)   | <b>N(2)-N(12)-C(1)-N(11)</b> | 0.00(1)    |
| <b>N(6)-N(5)-C(6)-N(8)</b>   | 0.00(1)   | <b>N(1)-C(4)-C(6)-N(5)</b>   | -180.00(1) |
| <b>N(6)-N(5)-C(6)-C(4)</b>   | 180.00(1) | <b>N(1)-C(4)-C(6)-N(8)</b>   | 0.00(1)    |
| <b>N(5)-N(6)-C(7)-N(7)</b>   | 180.00(1) | <b>N(4)-C(4)-C(6)-N(5)</b>   | 0.00(1)    |
| <b>N(5)-N(6)-C(7)-N(8)</b>   | 0.00(1)   | <b>N(4)-C(4)-C(6)-N(8)</b>   | -180.00(1) |

**Table S7.** Fractional Atomic Coordinates ( $\times 10^4$ ) and Equivalent Isotropic Displacement Parameters ( $\text{\AA}^2 \times 10^3$ ) for **3c**.  $U_{eq}$  is defined as 1/3 of the trace of the orthogonalised  $U_{ij}$  tensor.

|            | x        | y          | z          | U(eq)   |
|------------|----------|------------|------------|---------|
| <b>C1</b>  | 9014(5)  | 2546(2)    | 6941(2)    | 36.1(6) |
| <b>C2</b>  | 7175(4)  | 3004(2)    | 6378.9(19) | 33.5(6) |
| <b>C3</b>  | 7524(4)  | 2835(2)    | 5485.2(19) | 34.0(6) |
| <b>C4</b>  | 3858(4)  | 3077(2)    | 4325(2)    | 38.3(7) |
| <b>C5</b>  | 5471(4)  | 3725(2)    | 3331.3(18) | 31.1(6) |
| <b>C6</b>  | 5645(4)  | 4144(2)    | 2452.1(18) | 30.9(6) |
| <b>C7</b>  | 6868(5)  | 4885(2)    | 1345.7(19) | 37.9(7) |
| <b>N1</b>  | 5378(4)  | 3539.1(19) | 6697.0(17) | 41.3(6) |
| <b>N2</b>  | 10289(4) | 2145.7(18) | 6389.4(15) | 37.3(6) |
| <b>N3</b>  | 9428(4)  | 2306.0(19) | 5492.1(16) | 37.2(6) |
| <b>N4</b>  | 6189(4)  | 3142.2(18) | 4644.7(15) | 34.5(6) |
| <b>N5</b>  | 7258(3)  | 3563.2(18) | 3995.1(15) | 33.7(5) |
| <b>N6</b>  | 3310(3)  | 3436.9(19) | 3497.1(16) | 37.8(6) |
| <b>N7</b>  | 4060(4)  | 4045.6(19) | 1727.1(15) | 37.5(6) |
| <b>N8</b>  | 4774(4)  | 4510(2)    | 999.1(16)  | 44.3(6) |
| <b>N9</b>  | 8209(5)  | 5425(3)    | 889(2)     | 55.3(8) |
| <b>N10</b> | 7496(4)  | 4662.5(17) | 2243.0(15) | 31.5(5) |
| <b>N11</b> | 9539(4)  | 5027(2)    | 2809.1(17) | 36.1(6) |
| <b>O1</b>  | 5376(4)  | 3534.1(19) | 7515.6(16) | 59.2(7) |
| <b>O2</b>  | 3929(4)  | 3971.5(17) | 6127.6(15) | 52.0(6) |

**Table S8.** Bond lengths [ $\text{\AA}$ ] and angles [ $^\circ$ ] for **3c**.

|               |          |                  |          |
|---------------|----------|------------------|----------|
| <b>C1-C2</b>  | 1.377(4) | <b>N2-C1-C2</b>  | 105.7(2) |
| <b>C1-N2</b>  | 1.325(4) | <b>C1-C2-C3</b>  | 105.5(2) |
| <b>C2-C3</b>  | 1.404(4) | <b>C1-C2-N1</b>  | 124.3(3) |
| <b>C2-N1</b>  | 1.427(4) | <b>C3-C2-N1</b>  | 130.2(3) |
| <b>C3-N3</b>  | 1.321(3) | <b>C2-C3-N4</b>  | 129.9(2) |
| <b>C3-N4</b>  | 1.406(4) | <b>N3-C3-C2</b>  | 110.8(2) |
| <b>C4-N4</b>  | 1.348(3) | <b>N3-C3-N4</b>  | 119.3(2) |
| <b>C4-N6</b>  | 1.311(4) | <b>N6-C4-N4</b>  | 110.8(2) |
| <b>C5-C6</b>  | 1.452(4) | <b>N5-C5-C6</b>  | 124.6(2) |
| <b>C5-N5</b>  | 1.308(3) | <b>N5-C5-N6</b>  | 115.6(2) |
| <b>C5-N6</b>  | 1.452(4) | <b>N6-C5-C6</b>  | 119.7(2) |
| <b>C6-N7</b>  | 1.286(3) | <b>N7-C6-C5</b>  | 123.7(2) |
| <b>C6-N10</b> | 1.373(3) | <b>N7-C6-N10</b> | 109.2(2) |
| <b>C7-N8</b>  | 1.330(4) | <b>N10-C6-C5</b> | 127.0(2) |
| <b>C7-N9</b>  | 1.348(4) | <b>N8-C7-N9</b>  | 126.0(3) |
| <b>C7-N10</b> | 1.352(4) | <b>N8-C7-N10</b> | 110.6(2) |
| <b>N1-O1</b>  | 1.220(3) | <b>N9-C7-N10</b> | 123.4(3) |

|                |          |                 |          |
|----------------|----------|-----------------|----------|
| <b>N1-O2</b>   | 1.228(3) | <b>O1-N1-C2</b> | 117.9(2) |
| <b>N2-N3</b>   | 1.353(3) | <b>O1-N1-O2</b> | 124.3(2) |
| <b>N4-N5</b>   | 1.372(3) | <b>O2-N1-C2</b> | 117.8(2) |
| <b>N7-N8</b>   | 1.388(3) | <b>C1-N2-N3</b> | 113.6(2) |
| <b>N10-N11</b> | 1.409(3) | <b>C3-N3-N2</b> | 104.4(2) |
|                |          | <b>C4-N4-C3</b> | 129.8(2) |

**Table S9.** Anisotropic displacement parameters ( $\text{\AA}^2 \times 10^3$ ) for **3c**. The anisotropic displacement factor exponent takes the form:  $-2\pi^2 [h^2a^{*2}U^{11} + \dots + 2hk a^* b^* U^{12}]$ .

| <b>Atom</b>  | <b>U<sup>11</sup></b> | <b>U<sup>22</sup></b> | <b>U<sup>33</sup></b> | <b>U<sup>23</sup></b> | <b>U<sup>13</sup></b> | <b>U<sup>12</sup></b> |
|--------------|-----------------------|-----------------------|-----------------------|-----------------------|-----------------------|-----------------------|
| <b>C(1)</b>  | 42.1(14)              | 39.2(17)              | 28.0(15)              | 1.9(12)               | 9.1(11)               | -3.6(12)              |
| <b>C(2)</b>  | 36.4(13)              | 33.0(15)              | 33.3(16)              | 2.8(12)               | 11.7(11)              | 0.1(11)               |
| <b>C(3)</b>  | 31.4(12)              | 38.9(17)              | 32.9(15)              | 5.9(13)               | 9.0(10)               | -1.1(11)              |
| <b>C(4)</b>  | 31.6(13)              | 50.9(19)              | 33.6(16)              | 5.4(13)               | 9.3(11)               | -3.0(12)              |
| <b>C(5)</b>  | 28.7(12)              | 36.3(16)              | 28.6(14)              | -0.2(12)              | 6.1(10)               | -0.3(11)              |
| <b>C(6)</b>  | 30.1(12)              | 33.9(16)              | 29.0(14)              | 2.4(12)               | 6.6(10)               | 1.2(11)               |
| <b>C(7)</b>  | 39.9(14)              | 44.6(18)              | 30.6(15)              | 4.6(13)               | 10.3(12)              | -1.0(12)              |
| <b>N(1)</b>  | 47.9(13)              | 41.7(16)              | 36.5(14)              | -0.1(12)              | 14.0(11)              | 5.5(11)               |
| <b>N(2)</b>  | 34.3(11)              | 47.2(16)              | 30.4(13)              | 5.9(11)               | 5.9(9)                | 3.8(10)               |
| <b>N(3)</b>  | 32.8(11)              | 48.5(16)              | 31.0(13)              | 6.4(11)               | 7.7(9)                | 4.4(10)               |
| <b>N(4)</b>  | 28.4(10)              | 46.5(15)              | 28.9(12)              | 7.0(11)               | 6.4(9)                | -0.2(10)              |
| <b>N(5)</b>  | 33.6(11)              | 42.1(14)              | 26.4(12)              | 5.9(10)               | 8.1(9)                | -1.6(10)              |
| <b>N(6)</b>  | 30.8(11)              | 52.7(17)              | 31.2(13)              | 4.7(12)               | 9.2(9)                | -3.3(10)              |
| <b>N(7)</b>  | 37.6(11)              | 48.0(16)              | 26.4(13)              | 2.0(11)               | 4.9(10)               | -3.5(10)              |
| <b>N(8)</b>  | 45.1(13)              | 60.1(18)              | 27.3(13)              | 7.9(12)               | 5.6(10)               | -12.1(12)             |
| <b>N(9)</b>  | 51.5(16)              | 78(2)                 | 36.6(16)              | 15.2(15)              | 7.5(13)               | -17.2(15)             |
| <b>N(10)</b> | 31.1(10)              | 37.7(14)              | 25.6(12)              | 2.5(10)               | 5.2(9)                | -1.0(9)               |
| <b>N(11)</b> | 31.6(11)              | 41.2(16)              | 35.4(14)              | -1.2(12)              | 5.7(10)               | -3.8(11)              |
| <b>O(1)</b>  | 81.4(15)              | 63.5(17)              | 38.5(13)              | 1.7(12)               | 26.2(11)              | 21.9(13)              |
| <b>O(2)</b>  | 57.4(12)              | 53.3(15)              | 45.1(13)              | 1.3(11)               | 9.1(10)               | 21.9(11)              |

**Table S10.** Torsion angles [ $^\circ$ ] for **3c**.

|                            |           |                             |           |
|----------------------------|-----------|-----------------------------|-----------|
| <b>C(1)-C(2)-C(3)-N(3)</b> | 0.4(3)    | <b>N(2)-C(1)-C(2)-N(1)</b>  | -179.3(3) |
| <b>C(1)-C(2)-C(3)-N(4)</b> | -179.4(3) | <b>N(3)-C(3)-N(4)-C(4)</b>  | 130.3(3)  |
| <b>C(1)-C(2)-N(1)-O(1)</b> | -5.4(4)   | <b>N(3)-C(3)-N(4)-N(5)</b>  | -48.1(4)  |
| <b>C(1)-C(2)-N(1)-O(2)</b> | 174.9(3)  | <b>N(4)-C(3)-N(3)-N(2)</b>  | 179.5(2)  |
| <b>C(1)-N(2)-N(3)-C(3)</b> | 0.2(3)    | <b>N(4)-C(4)-N(6)-C(5)</b>  | 0.2(3)    |
| <b>C(2)-C(1)-N(2)-N(3)</b> | 0.1(3)    | <b>N(5)-C(5)-C(6)-N(7)</b>  | 159.1(3)  |
| <b>C(2)-C(3)-N(3)-N(2)</b> | -0.4(3)   | <b>N(5)-C(5)-C(6)-N(10)</b> | -18.2(5)  |
| <b>C(2)-C(3)-N(4)-C(4)</b> | -49.9(5)  | <b>N(5)-C(5)-N(6)-C(4)</b>  | 0.0(3)    |
| <b>C(2)-C(3)-N(4)-N(5)</b> | 131.6(3)  | <b>N(6)-C(4)-N(4)-C(3)</b>  | -178.9(3) |
| <b>C(3)-C(2)-N(1)-O(1)</b> | 175.8(3)  | <b>N(6)-C(4)-N(4)-N(5)</b>  | -0.3(4)   |

|                       |           |                       |           |
|-----------------------|-----------|-----------------------|-----------|
| C(3)-C(2)-N(1)-O(2)   | -3.9(5)   | N(6)-C(5)-C(6)-N(7)   | -18.7(4)  |
| C(3)-N(4)-N(5)-C(5)   | 179.1(3)  | N(6)-C(5)-C(6)-N(10)  | 164.0(3)  |
| C(4)-N(4)-N(5)-C(5)   | 0.3(3)    | N(6)-C(5)-N(5)-N(4)   | -0.2(3)   |
| C(5)-C(6)-N(7)-N(8)   | -178.6(3) | N(7)-C(6)-N(10)-C(7)  | 1.4(3)    |
| C(5)-C(6)-N(10)-C(7)  | 179.0(3)  | N(7)-C(6)-N(10)-N(11) | 173.9(3)  |
| C(5)-C(6)-N(10)-N(11) | -8.5(5)   | N(8)-C(7)-N(10)-C(6)  | -1.5(3)   |
| C(6)-C(5)-N(5)-N(4)   | -178.1(3) | N(8)-C(7)-N(10)-N(11) | -174.6(3) |
| C(6)-C(5)-N(6)-C(4)   | 178.0(3)  | N(9)-C(7)-N(8)-N(7)   | -178.1(3) |
| C(6)-N(7)-N(8)-C(7)   | 0.0(3)    | N(9)-C(7)-N(10)-C(6)  | 177.7(3)  |
| N(1)-C(2)-C(3)-N(3)   | 179.4(3)  | N(9)-C(7)-N(10)-N(11) | 4.5(5)    |
| N(1)-C(2)-C(3)-N(4)   | -0.4(5)   | N(10)-C(6)-N(7)-N(8)  | -0.9(3)   |
| N(2)-C(1)-C(2)-C(3)   | -0.3(3)   | N(10)-C(7)-N(8)-N(7)  | 1.0(3)    |

**Table S11.** Hydrogen Atom Coordinates ( $\text{\AA}\times 10^4$ ) and Isotropic Displacement Parameters ( $\text{\AA}^2\times 10^3$ ) for **3c**

| Atom   | x         | y        | z        | U(eq)  |
|--------|-----------|----------|----------|--------|
| H1     | 9307.49   | 2521.58  | 7590.24  | 43     |
| H(4)   | 2761.49   | 2806.36  | 4654.76  | 46     |
| H(2)   | 11573.8   | 1807.73  | 6587.48  | 45     |
| H(9A)  | 9660(40)  | 5560(20) | 1190(20) | 46(9)  |
| H(9B)  | 7680(60)  | 5420(30) | 296(13)  | 54(10) |
| H(11A) | 9100(60)  | 5340(30) | 3280(20) | 61(11) |
| H(11B) | 10270(70) | 4530(30) | 3040(30) | 66(12) |

**Table S12.** Fractional Atomic Coordinates ( $\times 10^4$ ) and Equivalent Isotropic Displacement Parameters ( $\text{\AA}^2\times 10^3$ ) for **4c**. Ueq is defined as 1/3 of the trace of the orthogonalised Uij tensor.

|    | x        | y       | z       | U(eq) |
|----|----------|---------|---------|-------|
| C1 | 3998(6)  | 2494(3) | 6606(2) | 45(1) |
| C2 | 2388(6)  | 3350(2) | 6379(2) | 42(1) |
| C3 | 716(6)   | 2709(3) | 5949(2) | 45(1) |
| C4 | 1030(7)  | 5133(3) | 6937(2) | 54(1) |
| C5 | 3279(6)  | 6320(2) | 6522(2) | 44(1) |
| C6 | 4351(6)  | 7438(2) | 6373(2) | 44(1) |
| C7 | 6655(7)  | 8752(3) | 5968(2) | 47(1) |
| N1 | 6193(6)  | 2595(3) | 7075(2) | 58(1) |
| N2 | 3372(6)  | 1449(2) | 6337(1) | 52(1) |
| N3 | 1277(6)  | 1574(2) | 5930(1) | 53(1) |
| N4 | -1398(6) | 3112(3) | 5533(1) | 62(1) |
| N5 | 2410(5)  | 4558(2) | 6540(1) | 44(1) |
| N6 | 3905(5)  | 5316(2) | 6261(1) | 48(1) |
| N7 | 1484(6)  | 6258(2) | 6940(2) | 57(1) |
| N8 | 6243(5)  | 7587(2) | 5992(1) | 43(1) |

|            |          |         |         |        |
|------------|----------|---------|---------|--------|
| <b>N9</b>  | 5078(6)  | 9238(2) | 6323(1) | 54(1)  |
| <b>N10</b> | 3602(6)  | 8437(2) | 6579(2) | 54(1)  |
| <b>N11</b> | 7444(6)  | 6780(2) | 5618(2) | 59(1)  |
| <b>N12</b> | 8309(6)  | 9253(2) | 5640(2) | 64(1)  |
| <b>O1</b>  | 7499(6)  | 1746(3) | 7142(2) | 84(1)  |
| <b>O2</b>  | 6522(6)  | 3526(2) | 7381(2) | 79(1)  |
| <b>O3</b>  | -2630(6) | 2379(3) | 5203(2) | 99(1)  |
| <b>O4</b>  | -1812(7) | 4145(3) | 5521(2) | 100(1) |

**Table S13.** Bond lengths [ $\text{\AA}$ ] and angles [ $^\circ$ ] for **4c**.

|                 |          |                  |          |
|-----------------|----------|------------------|----------|
| <b>C1-N2</b>    | 1.336(4) | <b>N2-C1-C2</b>  | 112.4(3) |
| <b>C1-C2</b>    | 1.374(4) | <b>N2-C1-N1</b>  | 118.8(3) |
| <b>C1-N1</b>    | 1.451(5) | <b>C2-C1-N1</b>  | 128.9(3) |
| <b>C2-C3</b>    | 1.392(4) | <b>C1-C2-C3</b>  | 101.0(3) |
| <b>C2-N5</b>    | 1.419(4) | <b>C1-C2-N5</b>  | 129.7(3) |
| <b>C3-N3</b>    | 1.339(4) | <b>C3-C2-N5</b>  | 129.3(3) |
| <b>C3-N4</b>    | 1.435(5) | <b>N3-C3-C2</b>  | 112.5(3) |
| <b>C4-N7</b>    | 1.315(4) | <b>N3-C3-N4</b>  | 118.8(3) |
| <b>C4-N5</b>    | 1.328(4) | <b>C2-C3-N4</b>  | 128.7(3) |
| <b>C4-H4</b>    | 0.9300   | <b>N7-C4-N5</b>  | 111.2(3) |
| <b>C5-N6</b>    | 1.321(4) | <b>N7-C4-H4</b>  | 124.4    |
| <b>C5-N7</b>    | 1.366(5) | <b>N5-C4-H4</b>  | 124.4    |
| <b>C5-C6</b>    | 1.459(4) | <b>N6-C5-N7</b>  | 115.4(3) |
| <b>C6-N10</b>   | 1.299(4) | <b>N6-C5-C6</b>  | 123.7(3) |
| <b>C6-N8</b>    | 1.374(4) | <b>N7-C5-C6</b>  | 121.0(3) |
| <b>C7-N9</b>    | 1.308(4) | <b>N10-C6-N8</b> | 110.7(3) |
| <b>C7-N12</b>   | 1.317(4) | <b>N10-C6-C5</b> | 123.8(3) |
| <b>C7-N8</b>    | 1.358(4) | <b>N8-C6-C5</b>  | 125.4(3) |
| <b>N1-O1</b>    | 1.219(4) | <b>N9-C7-N12</b> | 129.0(3) |
| <b>N1-O2</b>    | 1.223(4) | <b>N9-C7-N8</b>  | 105.7(3) |
| <b>N2-N3</b>    | 1.349(4) | <b>N12-C7-N8</b> | 125.3(3) |
| <b>N4-O4</b>    | 1.206(4) | <b>O1-N1-O2</b>  | 126.0(4) |
| <b>N4-O3</b>    | 1.221(4) | <b>O1-N1-C1</b>  | 117.8(3) |
| <b>N5-N6</b>    | 1.363(3) | <b>O2-N1-C1</b>  | 116.2(3) |
| <b>N8-N11</b>   | 1.394(4) | <b>C1-N2-N3</b>  | 107.7(3) |
| <b>N9-N10</b>   | 1.368(4) | <b>C3-N3-N2</b>  | 106.4(2) |
| <b>N9-H9</b>    | 0.8600   | <b>O4-N4-O3</b>  | 124.5(4) |
| <b>N11-H11A</b> | 0.8600   | <b>O4-N4-C3</b>  | 118.3(3) |
| <b>N11-H11B</b> | 0.8600   | <b>O3-N4-C3</b>  | 117.1(3) |
| <b>N12-H12A</b> | 0.8600   | <b>C4-N5-N6</b>  | 110.0(2) |
| <b>N12-H12B</b> | 0.8600   | <b>C4-N5-C2</b>  | 128.2(3) |
|                 |          | <b>N6-N5-C2</b>  | 121.7(3) |

|                      |          |
|----------------------|----------|
| <b>C5-N6-N5</b>      | 101.5(2) |
| <b>C4-N7-C5</b>      | 101.9(3) |
| <b>C7-N8-C6</b>      | 106.7(3) |
| <b>C7-N8-N11</b>     | 122.6(3) |
| <b>C6-N8-N11</b>     | 130.3(2) |
| <b>C7-N9-N10</b>     | 112.5(3) |
| <b>C7-N9-H9</b>      | 123.7    |
| <b>N10-N9-H9</b>     | 123.7    |
| <b>C6-N10-N9</b>     | 104.3(3) |
| <b>N8-N11-H11A</b>   | 120.0    |
| <b>N8-N11-H11B</b>   | 120.0    |
| <b>H11A-N11-H11B</b> | 120.0    |
| <b>C7-N12-H12A</b>   | 120.0    |
| <b>C7-N12-H12B</b>   | 120.0    |
| <b>H12A-N12-H12B</b> | 120.0    |

**Table S14.** Anisotropic displacement parameters ( $\text{\AA}^2 \times 10^3$ ) for **4c**. The anisotropic displacement factor exponent takes the form:  $-2\pi^2 [h^2 a^{*2} U^{11} + \dots + 2 h k a^* b^* U^{12}]$ .

| <b>Atom</b>  | <b>U<sup>11</sup></b> | <b>U<sup>22</sup></b> | <b>U<sup>33</sup></b> | <b>U<sup>23</sup></b> | <b>U<sup>13</sup></b> | <b>U<sup>12</sup></b> |
|--------------|-----------------------|-----------------------|-----------------------|-----------------------|-----------------------|-----------------------|
| <b>C(1)</b>  | 58(2)                 | 30(2)                 | 44(2)                 | 2(1)                  | 0(1)                  | -1(1)                 |
| <b>C(2)</b>  | 64(2)                 | 20(1)                 | 41(2)                 | -1(1)                 | 4(1)                  | -4(1)                 |
| <b>C(3)</b>  | 62(2)                 | 32(2)                 | 40(2)                 | -4(1)                 | -2(1)                 | -4(2)                 |
| <b>C(4)</b>  | 80(3)                 | 30(2)                 | 54(2)                 | -3(1)                 | 19(2)                 | -5(2)                 |
| <b>C(5)</b>  | 63(2)                 | 22(2)                 | 45(2)                 | -2(1)                 | -3(2)                 | -2(1)                 |
| <b>C(6)</b>  | 61(2)                 | 26(2)                 | 44(2)                 | -4(1)                 | -5(2)                 | 2(1)                  |
| <b>C(7)</b>  | 70(2)                 | 22(2)                 | 45(2)                 | -3(1)                 | -5(2)                 | -1(2)                 |
| <b>N(1)</b>  | 63(2)                 | 50(2)                 | 61(2)                 | 8(1)                  | 1(2)                  | -6(2)                 |
| <b>N(2)</b>  | 75(2)                 | 22(1)                 | 56(2)                 | -3(1)                 | 2(1)                  | 0(1)                  |
| <b>N(3)</b>  | 76(2)                 | 29(1)                 | 51(2)                 | -9(1)                 | -1(1)                 | -5(1)                 |
| <b>N(4)</b>  | 71(2)                 | 65(2)                 | 48(2)                 | -8(1)                 | -7(2)                 | 6(2)                  |
| <b>N(5)</b>  | 65(2)                 | 21(1)                 | 47(1)                 | -2(1)                 | 6(1)                  | -4(1)                 |
| <b>N(6)</b>  | 66(2)                 | 21(1)                 | 58(2)                 | -2(1)                 | 8(1)                  | -5(1)                 |
| <b>N(7)</b>  | 83(2)                 | 29(1)                 | 60(2)                 | -7(1)                 | 19(2)                 | -2(1)                 |
| <b>N(8)</b>  | 55(2)                 | 23(1)                 | 48(1)                 | -3(1)                 | -3(1)                 | -1(1)                 |
| <b>N(9)</b>  | 75(2)                 | 20(1)                 | 64(2)                 | -2(1)                 | 2(2)                  | -4(1)                 |
| <b>N(10)</b> | 71(2)                 | 24(1)                 | 66(2)                 | -3(1)                 | 6(2)                  | -3(1)                 |
| <b>N(11)</b> | 70(2)                 | 26(1)                 | 84(2)                 | -5(1)                 | 25(2)                 | -2(1)                 |
| <b>N(12)</b> | 89(2)                 | 28(2)                 | 77(2)                 | -4(1)                 | 15(2)                 | -12(2)                |
| <b>O(1)</b>  | 68(2)                 | 81(2)                 | 99(2)                 | 8(2)                  | -4(2)                 | 23(2)                 |
| <b>O(2)</b>  | 89(2)                 | 52(2)                 | 88(2)                 | 0(1)                  | -24(2)                | -22(2)                |
| <b>O(3)</b>  | 94(2)                 | 107(3)                | 85(2)                 | -9(2)                 | -38(2)                | -22(2)                |
| <b>O(4)</b>  | 118(3)                | 71(2)                 | 100(2)                | -22(2)                | -35(2)                | 46(2)                 |

**Table S15.** Hydrogen Atom Coordinates ( $\text{\AA}\times 10^4$ ) and Isotropic Displacement Parameters ( $\text{\AA}^2\times 10^3$ ) for **4c**.

| Atom   | x    | y     | z    | U(eq) |
|--------|------|-------|------|-------|
| H(4)   | -109 | 4784  | 7182 | 64    |
| H(9)   | 4979 | 9977  | 6389 | 65    |
| H(11A) | 8494 | 7015  | 5360 | 70    |
| H(11B) | 7134 | 6048  | 5646 | 70    |
| H(12A) | 8449 | 10000 | 5643 | 77    |
| H(12B) | 9248 | 8832  | 5422 | 77    |

**Table S16.** Torsion angles [ $^\circ$ ] for **4c**.

|                      |           |                       |           |
|----------------------|-----------|-----------------------|-----------|
| N(2)-C(1)-C(2)-C(3)  | 0.4(4)    | N(7)-C(4)-N(5)-C(2)   | -176.9(3) |
| N(1)-C(1)-C(2)-C(3)  | 179.9(3)  | C(1)-C(2)-N(5)-C(4)   | -107.9(4) |
| N(2)-C(1)-C(2)-N(5)  | -179.9(3) | C(3)-C(2)-N(5)-C(4)   | 71.8(5)   |
| N(1)-C(1)-C(2)-N(5)  | -0.3(6)   | C(1)-C(2)-N(5)-N(6)   | 74.7(4)   |
| C(1)-C(2)-C(3)-N(3)  | 0.6(4)    | C(3)-C(2)-N(5)-N(6)   | -105.6(4) |
| N(5)-C(2)-C(3)-N(3)  | -179.1(3) | N(7)-C(5)-N(6)-N(5)   | -0.6(4)   |
| C(1)-C(2)-C(3)-N(4)  | -177.8(3) | C(6)-C(5)-N(6)-N(5)   | -179.2(3) |
| N(5)-C(2)-C(3)-N(4)  | 2.4(6)    | C(4)-N(5)-N(6)-C(5)   | -0.1(3)   |
| N(6)-C(5)-C(6)-N(10) | 173.8(3)  | C(2)-N(5)-N(6)-C(5)   | 177.7(3)  |
| N(7)-C(5)-C(6)-N(10) | -4.7(5)   | N(5)-C(4)-N(7)-C(5)   | -1.0(4)   |
| N(6)-C(5)-C(6)-N(8)  | -5.2(5)   | N(6)-C(5)-N(7)-C(4)   | 1.0(4)    |
| N(7)-C(5)-C(6)-N(8)  | 176.3(3)  | C(6)-C(5)-N(7)-C(4)   | 179.6(3)  |
| N(2)-C(1)-N(1)-O(1)  | 7.9(5)    | N(9)-C(7)-N(8)-C(6)   | 0.4(3)    |
| C(2)-C(1)-N(1)-O(1)  | -171.6(3) | N(12)-C(7)-N(8)-C(6)  | -178.9(3) |
| N(2)-C(1)-N(1)-O(2)  | -170.2(3) | N(9)-C(7)-N(8)-N(11)  | 174.3(3)  |
| C(2)-C(1)-N(1)-O(2)  | 10.3(5)   | N(12)-C(7)-N(8)-N(11) | -5.0(5)   |
| C(2)-C(1)-N(2)-N(3)  | -1.3(4)   | N(10)-C(6)-N(8)-C(7)  | 0.0(4)    |
| N(1)-C(1)-N(2)-N(3)  | 179.2(3)  | C(5)-C(6)-N(8)-C(7)   | 179.1(3)  |
| C(2)-C(3)-N(3)-N(2)  | -1.4(4)   | N(10)-C(6)-N(8)-N(11) | -173.2(3) |
| N(4)-C(3)-N(3)-N(2)  | 177.2(3)  | C(5)-C(6)-N(8)-N(11)  | 5.9(5)    |
| C(1)-N(2)-N(3)-C(3)  | 1.6(4)    | N(12)-C(7)-N(9)-N(10) | 178.6(3)  |
| N(3)-C(3)-N(4)-O(4)  | -175.6(4) | N(8)-C(7)-N(9)-N(10)  | -0.6(3)   |
| C(2)-C(3)-N(4)-O(4)  | 2.8(6)    | N(8)-C(6)-N(10)-N(9)  | -0.4(3)   |
| N(3)-C(3)-N(4)-O(3)  | 2.8(5)    | C(5)-C(6)-N(10)-N(9)  | -179.5(3) |
| C(2)-C(3)-N(4)-O(3)  | -178.8(3) | C(7)-N(9)-N(10)-C(6)  | 0.6(4)    |
| N(7)-C(4)-N(5)-N(6)  | 0.7(4)    |                       |           |

**Table S17.** Fractional Atomic Coordinates ( $\times 10^4$ ) and Equivalent Isotropic Displacement Parameters ( $\text{\AA}^2 \times 10^3$ ) for  $5\text{c}^- \cdot \text{NO}_3^+ \cdot \text{H}_2\text{O}$ .  $U_{\text{eq}}$  is defined as 1/3 of the trace of the orthogonalised  $U_{ij}$  tensor.

|            | <b>x</b> | <b>y</b>    | <b>z</b>   | <b>U(eq)</b> |
|------------|----------|-------------|------------|--------------|
| <b>C1</b>  | 1735(3)  | -765(2)     | 5307.0(17) | 22.6(4)      |
| <b>C2</b>  | 3344(3)  | 829(2)      | 5647.7(16) | 21.7(4)      |
| <b>C3</b>  | 3698(3)  | 1206(2)     | 4605.1(16) | 21.2(4)      |
| <b>C4</b>  | 6550(3)  | 4054(2)     | 5046.1(17) | 26.0(4)      |
| <b>C5</b>  | 6470(3)  | 4007(2)     | 3332.4(16) | 23.1(4)      |
| <b>C6</b>  | 7015(3)  | 4539(2)     | 2341.4(16) | 23.6(4)      |
| <b>C7</b>  | 7266(3)  | 4524(2)     | 590.9(17)  | 26.1(4)      |
| <b>N1</b>  | 804(3)   | -1741(2)    | 5908.2(15) | 27.2(4)      |
| <b>N2</b>  | 1278(3)  | -1186(2)    | 4162.7(14) | 25.5(4)      |
| <b>N3</b>  | 2452(3)  | -2(2)       | 3714.9(14) | 24.7(4)      |
| <b>N4</b>  | 4373(3)  | 1654(2)     | 6785.4(14) | 28.7(4)      |
| <b>N5</b>  | 5084(3)  | 2603(2)     | 4370.1(13) | 22.1(4)      |
| <b>N6</b>  | 5025(3)  | 2568(2)     | 3246.0(14) | 25.0(4)      |
| <b>N7</b>  | 7455(3)  | 4978(2)     | 4420.1(14) | 26.6(4)      |
| <b>N8</b>  | 8181(3)  | 6044(2)     | 2386.9(14) | 27.5(4)      |
| <b>N9</b>  | 8332(3)  | 6028(2)     | 1284.7(14) | 28.2(4)      |
| <b>N10</b> | 6407(3)  | 3552(2)     | 1243.9(14) | 24.5(4)      |
| <b>N11</b> | 5285(3)  | 1857(2)     | 777.3(15)  | 30.5(4)      |
| <b>N12</b> | 7054(3)  | 4024(2)     | -505.7(15) | 36.7(5)      |
| <b>O1</b>  | 3748(3)  | 1020.3(19)  | 7536.3(13) | 37.8(4)      |
| <b>O2</b>  | 5872(3)  | 2971(2)     | 7022.4(14) | 53.8(6)      |
| <b>N13</b> | 628(3)   | 2607(2)     | 1653.6(17) | 33.7(4)      |
| <b>O3</b>  | 789(3)   | 3850(2)     | 2345(2)    | 72.0(7)      |
| <b>O4</b>  | 1782(3)  | 2733(3)     | 1005.6(17) | 57.7(6)      |
| <b>O5</b>  | -683(3)  | 1251(2)     | 1624.9(15) | 41.7(4)      |
| <b>O6</b>  | 1237(3)  | -1090.8(19) | 1267.8(13) | 38.1(4)      |



**Table S18.** Bond lengths [Å] and angles [°] for **5c<sup>-</sup>·NO<sub>3</sub><sup>+</sup>·H<sub>2</sub>O**.

|                |          |                   |            |
|----------------|----------|-------------------|------------|
| <b>C1-C2</b>   | 1.418(3) | <b>N1-C1-C2</b>   | 131.70(18) |
| <b>C1-N1</b>   | 1.326(3) | <b>N1-C1-N2</b>   | 123.34(18) |
| <b>C1-N2</b>   | 1.339(3) | <b>N2-C1-C2</b>   | 104.95(17) |
| <b>C2-C3</b>   | 1.427(3) | <b>C1-C2-C3</b>   | 104.97(16) |
| <b>C2-N4</b>   | 1.388(2) | <b>N4-C2-C1</b>   | 123.01(18) |
| <b>C3-N3</b>   | 1.312(2) | <b>N4-C2-C3</b>   | 131.74(18) |
| <b>C3-N5</b>   | 1.415(2) | <b>N3-C3-C2</b>   | 111.18(17) |
| <b>C4-N5</b>   | 1.355(3) | <b>N3-C3-N5</b>   | 116.33(17) |
| <b>C4-N7</b>   | 1.316(3) | <b>N5-C3-C2</b>   | 132.48(17) |
| <b>C5-C6</b>   | 1.455(3) | <b>N7-C4-N5</b>   | 110.48(18) |
| <b>C5-N6</b>   | 1.315(2) | <b>N6-C5-C6</b>   | 122.66(17) |
| <b>C5-N7</b>   | 1.366(2) | <b>N6-C5-N7</b>   | 115.67(17) |
| <b>C6-N8</b>   | 1.301(3) | <b>N7-C5-C6</b>   | 121.67(18) |
| <b>C6-N10</b>  | 1.381(2) | <b>N8-C6-C5</b>   | 123.36(18) |
| <b>C7-N9</b>   | 1.334(3) | <b>N8-C6-N10</b>  | 110.77(17) |
| <b>C7-N10</b>  | 1.354(3) | <b>N10-C6-C5</b>  | 125.87(18) |
| <b>C7-N12</b>  | 1.312(3) | <b>N9-C7-N10</b>  | 106.41(17) |
| <b>N2-N3</b>   | 1.374(2) | <b>N12-C7-N9</b>  | 128.7(2)   |
| <b>N4-O1</b>   | 1.239(2) | <b>N12-C7-N10</b> | 124.91(19) |
| <b>N4-O2</b>   | 1.229(2) | <b>C1-N2-N3</b>   | 113.78(16) |
| <b>N5-N6</b>   | 1.371(2) | <b>C3-N3-N2</b>   | 105.12(16) |
| <b>N8-N9</b>   | 1.380(2) | <b>O1-N4-C2</b>   | 118.24(17) |
| <b>N10-N11</b> | 1.403(2) | <b>O2-N4-C2</b>   | 119.81(18) |
| <b>N13-O3</b>  | 1.240(3) | <b>O2-N4-O1</b>   | 121.95(17) |
| <b>N13-O4</b>  | 1.246(3) | <b>C4-N5-C3</b>   | 133.09(17) |
| <b>N13-O5</b>  | 1.240(2) | <b>C4-N5-N6</b>   | 109.30(16) |
|                |          | <b>N6-N5-C3</b>   | 117.61(15) |
|                |          | <b>C5-N6-N5</b>   | 102.01(15) |
|                |          | <b>C4-N7-C5</b>   | 102.53(17) |
|                |          | <b>C6-N8-N9</b>   | 105.20(16) |
|                |          | <b>C7-N9-N8</b>   | 110.82(17) |
|                |          | <b>C6-N10-N11</b> | 132.55(17) |
|                |          | <b>C7-N10-C6</b>  | 106.80(16) |
|                |          | <b>C7-N10-N11</b> | 120.47(16) |
|                |          | <b>O3-N13-O4</b>  | 119.9(2)   |
|                |          | <b>O3-N13-O5</b>  | 119.0(2)   |
|                |          | <b>O5-N13-O4</b>  | 121.0(2)   |

**Table S19.** Anisotropic displacement parameters ( $\text{\AA}^2 \times 10^3$ ) for  $5\text{c}^- \cdot \text{NO}_3^+ \cdot \text{H}_2\text{O}$ . The anisotropic displacement factor exponent takes the form:  $-2\pi^2 [h^2 a^* 2 U^{11} + \dots + 2 h k a^* b^* U^{12}]$ .

| Atom | $U^{11}$ | $U^{22}$ | $U^{33}$  | $U^{23}$  | $U^{13}$ | $U^{12}$ |
|------|----------|----------|-----------|-----------|----------|----------|
| C1   | 21.5(9)  | 21.6(9)  | 23.6(10)  | 4.3(8)    | 6.8(7)   | 7.4(8)   |
| C2   | 21.6(9)  | 18.8(9)  | 18.8(9)   | 2.7(7)    | 3.4(7)   | 3.1(7)   |
| C3   | 20.4(9)  | 20.1(9)  | 20.4(9)   | 4.0(7)    | 5.6(7)   | 5.2(7)   |
| C4   | 29.2(10) | 21.3(9)  | 20.4(10)  | 4.0(8)    | 5.6(8)   | 2.8(8)   |
| C5   | 23.0(9)  | 22.3(10) | 20.2(10)  | 4.3(8)    | 5.6(7)   | 5.2(8)   |
| C6   | 24.0(10) | 22.2(10) | 19.2(9)   | 3.4(8)    | 4.3(7)   | 4.4(8)   |
| C7   | 27.8(10) | 24.5(10) | 20.9(10)  | 5.0(8)    | 5.8(8)   | 4.9(8)   |
| N1   | 29.6(9)  | 22.0(8)  | 22.8(9)   | 4.8(7)    | 6.4(7)   | 2.5(7)   |
| N2   | 25.4(9)  | 19.5(8)  | 22.3(9)   | 2.5(7)    | 4.5(7)   | 0.0(7)   |
| N3   | 24.2(8)  | 22.0(8)  | 21.0(8)   | 3.5(7)    | 4.4(7)   | 2.7(7)   |
| N4   | 31.1(9)  | 24.6(9)  | 20.2(8)   | 4.7(7)    | 7.0(7)   | -0.6(7)  |
| N5   | 23.4(8)  | 21.7(8)  | 17.0(8)   | 3.8(6)    | 4.5(6)   | 5.0(7)   |
| N6   | 26.9(9)  | 24.0(9)  | 18.2(8)   | 5.3(7)    | 5.3(7)   | 3.3(7)   |
| N7   | 30.4(9)  | 22.0(8)  | 21.2(8)   | 4.2(7)    | 6.9(7)   | 3.7(7)   |
| N8   | 33.4(10) | 23.0(9)  | 19.8(8)   | 4.6(7)    | 7.8(7)   | 3.8(7)   |
| N9   | 36.3(10) | 22.5(8)  | 19.1(8)   | 6.0(7)    | 9.5(7)   | 2.2(7)   |
| N10  | 27.2(9)  | 20.0(8)  | 18.1(8)   | 2.6(6)    | 5.0(7)   | 1.2(7)   |
| N11  | 34.2(10) | 19.9(8)  | 25.8(9)   | 0.5(7)    | 7.1(8)   | 0.1(7)   |
| N12  | 50.4(12) | 26.8(9)  | 19.1(9)   | 2.1(7)    | 10.2(8)  | 0.2(9)   |
| O1   | 46.0(10) | 33.9(9)  | 21.6(8)   | 7.8(6)    | 11.6(7)  | -0.2(7)  |
| O2   | 58.7(12) | 38.3(10) | 22.1(8)   | 1.2(7)    | 4.6(8)   | -24.4(9) |
| N13  | 27.1(9)  | 30.9(10) | 39.9(11)  | 14.5(8)   | 5.4(8)   | 7.4(8)   |
| O3   | 54.0(13) | 33.4(11) | 105.0(19) | -12.9(11) | 4.0(12)  | 12.6(9)  |
| O4   | 41.3(10) | 92.6(16) | 54.8(12)  | 47.5(12)  | 23.5(9)  | 25.9(11) |
| O5   | 41.3(10) | 28.7(8)  | 47.1(10)  | 12.0(7)   | 13.5(8)  | 2.5(7)   |
| O6   | 47.9(10) | 30.1(8)  | 25.9(8)   | 7.6(7)    | 5.3(7)   | 5.3(7)   |

**Table S20.** Torsion angles [ $^\circ$ ] for  $5\text{c}^- \cdot \text{NO}_3^+ \cdot \text{H}_2\text{O}$ .

|                     |           |                      |             |
|---------------------|-----------|----------------------|-------------|
| C(1)-C(2)-C(3)-N(3) | 0.3(2)    | N(3)-C(3)-N(5)-C(4)  | 179.5(2)    |
| C(1)-C(2)-C(3)-N(5) | 179.6(2)  | N(3)-C(3)-N(5)-N(6)  | -0.7(3)     |
| C(1)-C(2)-N(4)-O(1) | -5.6(3)   | N(4)-C(2)-C(3)-N(3)  | 174.2(2)    |
| C(1)-C(2)-N(4)-O(2) | 173.8(2)  | N(4)-C(2)-C(3)-N(5)  | -6.5(4)     |
| C(1)-N(2)-N(3)-C(3) | 0.2(2)    | N(5)-C(3)-N(3)-N(2)  | -179.75(16) |
| C(2)-C(1)-N(2)-N(3) | 0.0(2)    | N(5)-C(4)-N(7)-C(5)  | -0.4(2)     |
| C(2)-C(3)-N(3)-N(2) | -0.3(2)   | N(6)-C(5)-C(6)-N(8)  | 168.3(2)    |
| C(2)-C(3)-N(5)-C(4) | 0.2(4)    | N(6)-C(5)-C(6)-N(10) | -12.3(3)    |
| C(2)-C(3)-N(5)-N(6) | 180.0(2)  | N(6)-C(5)-N(7)-C(4)  | 0.5(2)      |
| C(3)-C(2)-N(4)-O(1) | -178.6(2) | N(7)-C(4)-N(5)-C(3)  | 180.00(19)  |
| C(3)-C(2)-N(4)-O(2) | 0.8(4)    | N(7)-C(4)-N(5)-N(6)  | 0.2(2)      |

|                       |             |                        |             |
|-----------------------|-------------|------------------------|-------------|
| C(3)-N(5)-N(6)-C(5)   | -179.74(17) | N(7)-C(5)-C(6)-N(8)    | -12.4(3)    |
| C(4)-N(5)-N(6)-C(5)   | 0.1(2)      | N(7)-C(5)-C(6)-N(10)   | 167.04(19)  |
| C(5)-C(6)-N(8)-N(9)   | 179.48(18)  | N(7)-C(5)-N(6)-N(5)    | -0.4(2)     |
| C(5)-C(6)-N(10)-C(7)  | -179.34(19) | N(8)-C(6)-N(10)-C(7)   | 0.1(2)      |
| C(5)-C(6)-N(10)-N(11) | -4.3(3)     | N(8)-C(6)-N(10)-N(11)  | 175.2(2)    |
| C(6)-C(5)-N(6)-N(5)   | 179.04(18)  | N(9)-C(7)-N(10)-C(6)   | -0.2(2)     |
| C(6)-C(5)-N(7)-C(4)   | -178.93(19) | N(9)-C(7)-N(10)-N(11)  | -175.96(18) |
| C(6)-N(8)-N(9)-C(7)   | -0.1(2)     | N(10)-C(6)-N(8)-N(9)   | 0.0(2)      |
| N(1)-C(1)-C(2)-C(3)   | 178.7(2)    | N(10)-C(7)-N(9)-N(8)   | 0.2(2)      |
| N(1)-C(1)-C(2)-N(4)   | 4.1(4)      | N(12)-C(7)-N(9)-N(8)   | -179.4(2)   |
| N(1)-C(1)-N(2)-N(3)   | -178.98(18) | N(12)-C(7)-N(10)-C(6)  | 179.5(2)    |
| N(2)-C(1)-C(2)-C(3)   | -0.2(2)     | N(12)-C(7)-N(10)-N(11) | 3.7(3)      |
| N(2)-C(1)-C(2)-N(4)   | -174.73(19) |                        |             |

**Table S21.** Hydrogen Atom Coordinates ( $\text{\AA}\times 10^4$ ) and Isotropic Displacement Parameters ( $\text{\AA}^2\times 10^3$ ) for  $5\mathbf{c}\cdot\text{NO}_3^+\cdot\text{H}_2\text{O}$ .

| Atom   | x       | y        | z       | U(eq) |
|--------|---------|----------|---------|-------|
| H(4)   | 6878.68 | 4360.76  | 5858.06 | 31    |
| H(1A)  | -167.96 | -2721.1  | 5555.22 | 33    |
| H(1B)  | 1158.01 | -1409.44 | 6660.09 | 33    |
| H(2)   | 315.53  | -2132.27 | 3736.66 | 31    |
| H(9)   | 9035.82 | 6893.67  | 1068.95 | 34    |
| H(11A) | 5959.24 | 1306.94  | 1099.63 | 37    |
| H(11B) | 4041.24 | 1552.44  | 902.81  | 37    |
| H(12A) | 7664.21 | 4724.27  | -876    | 44    |
| H(12B) | 6300.9  | 2988.04  | -871.12 | 44    |
| H(6A)  | 1841.21 | -580.48  | 1986.35 | 57    |
| H(6B)  | 523.63  | -540.94  | 1021.12 | 57    |

## 4. NMR Spectra

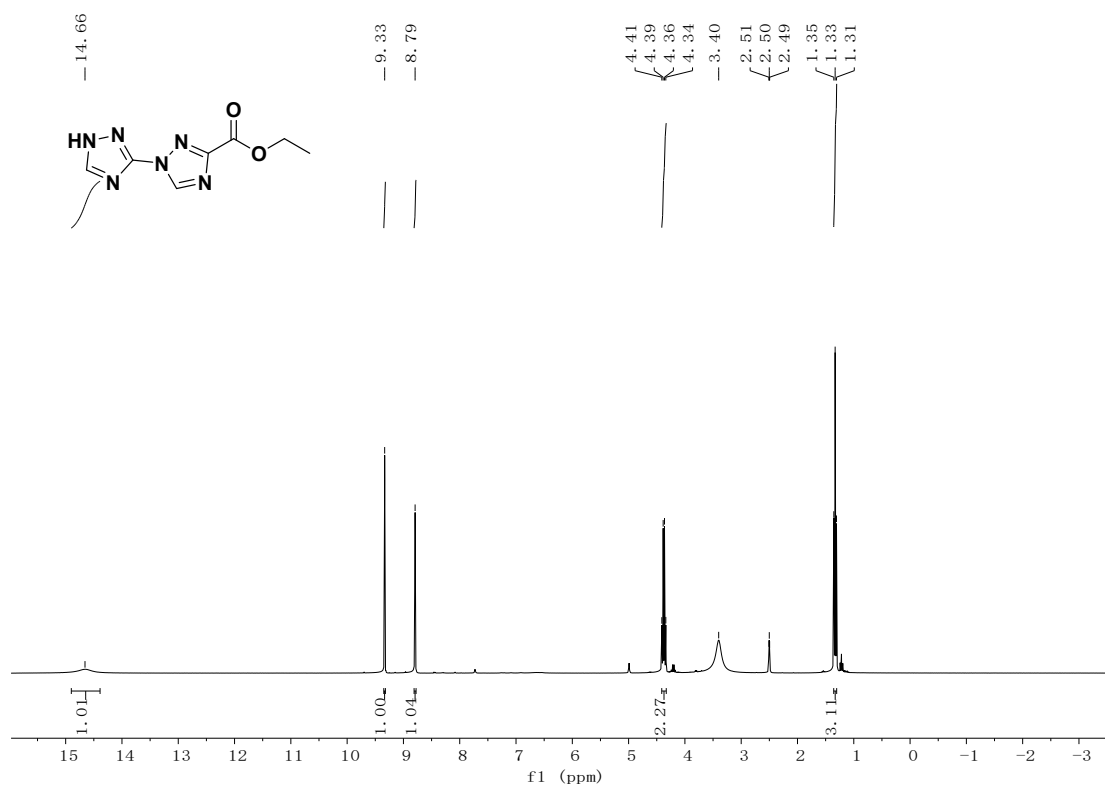

Fig. S1 <sup>1</sup>H NMR spectrum of **2a**.

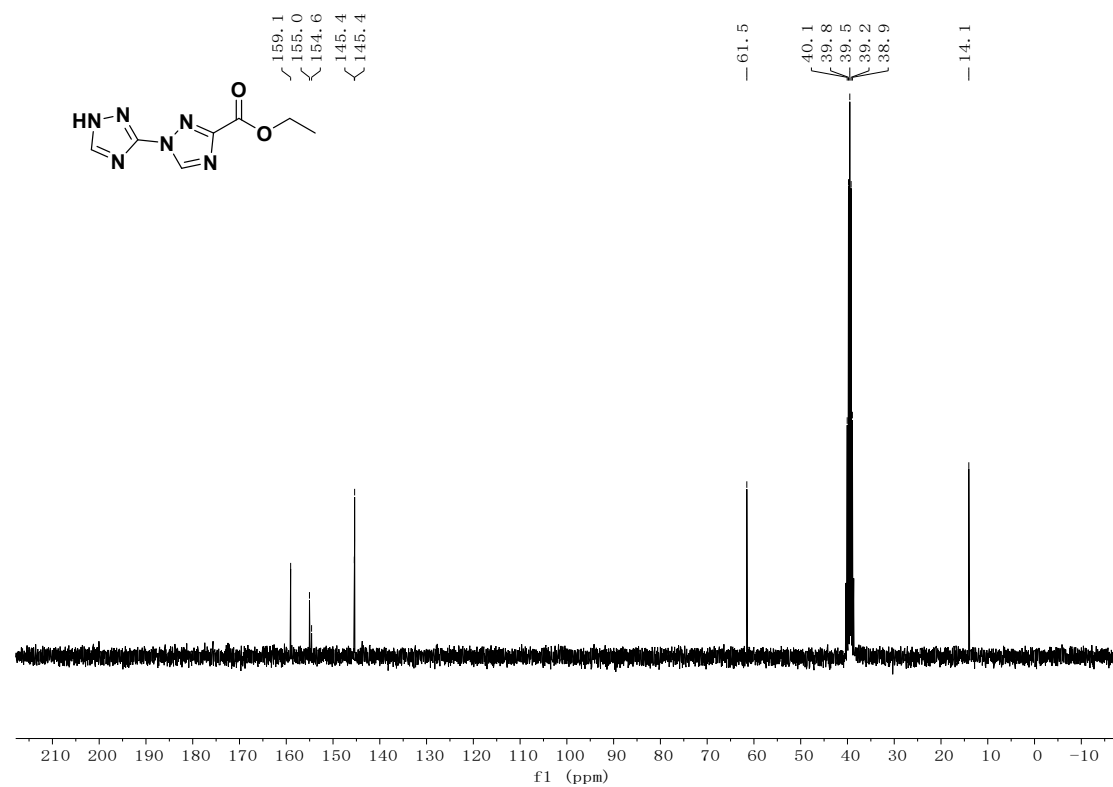

Fig. S2  $^{13}\text{C}$  NMR spectrum of **2a**.

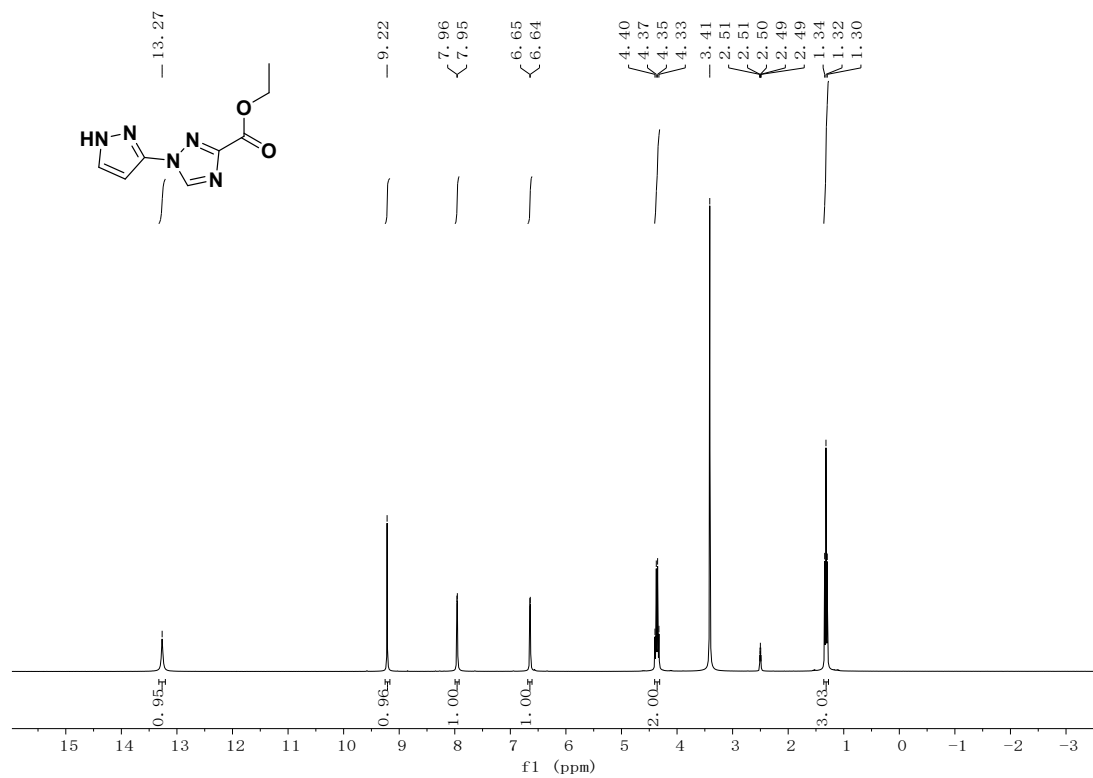

Fig. S3  $^1\text{H}$  NMR spectrum of **3a**.

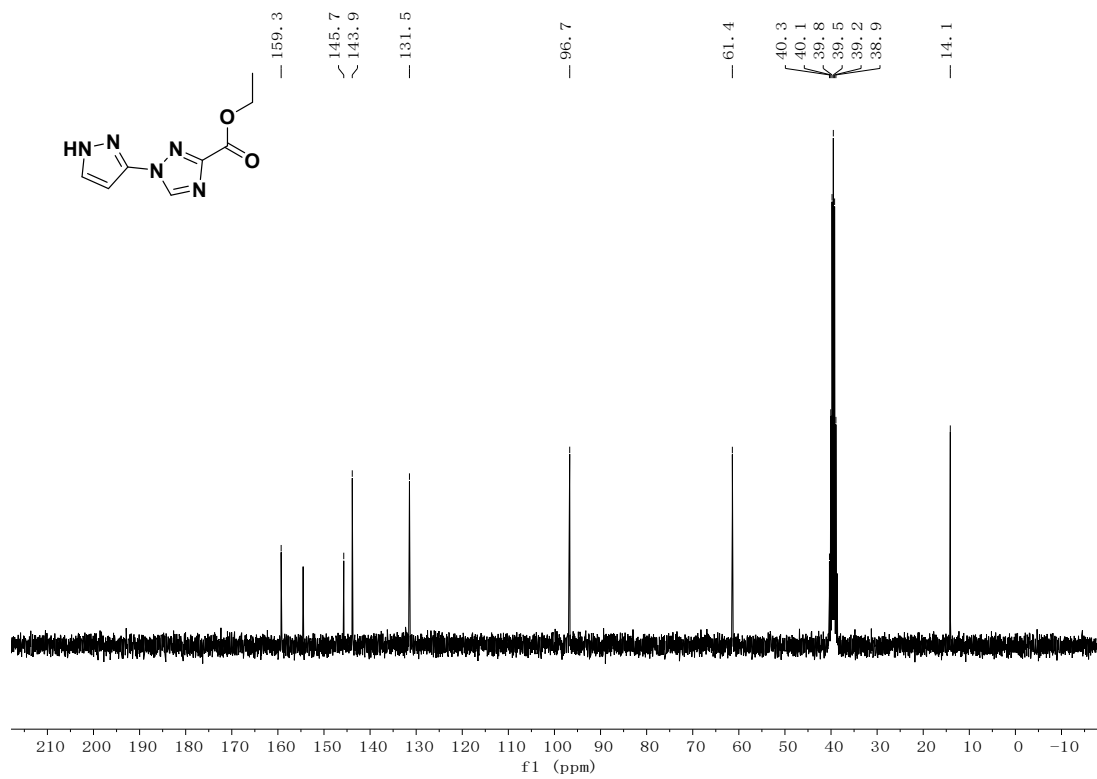

Fig. S4  $^{13}\text{C}$  NMR spectrum of **3a**.

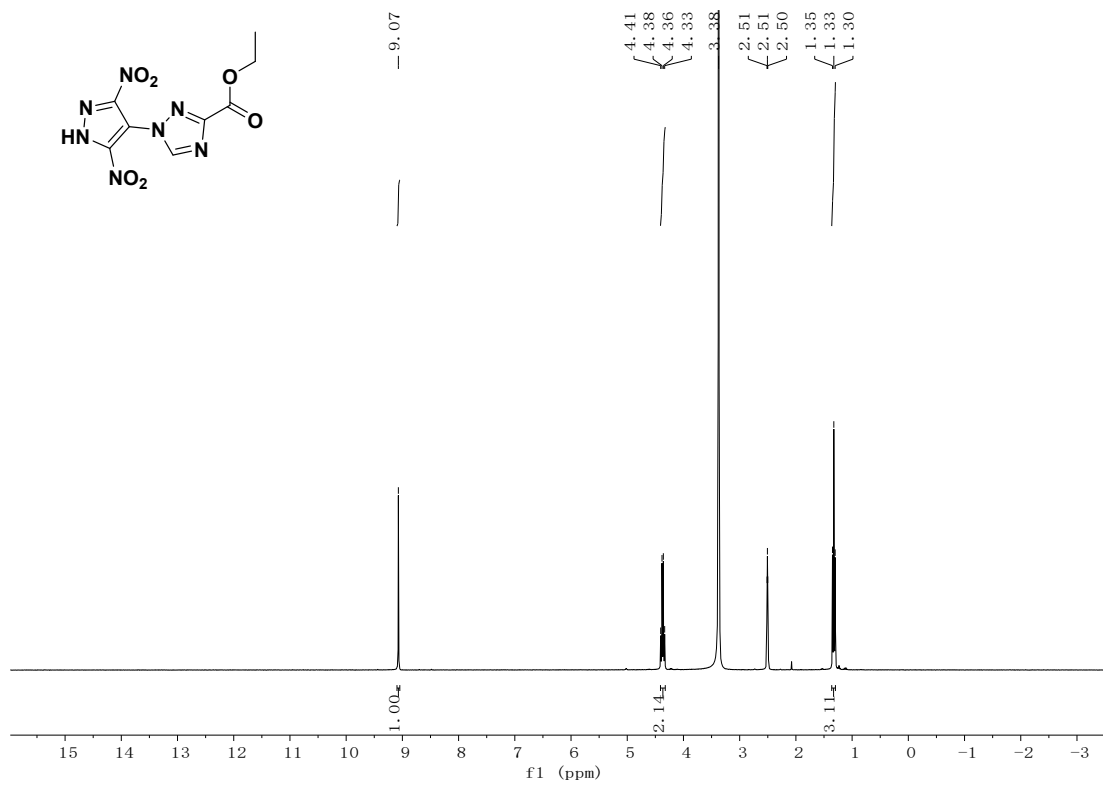

Fig. S5 <sup>1</sup>H NMR spectrum of **4a**.

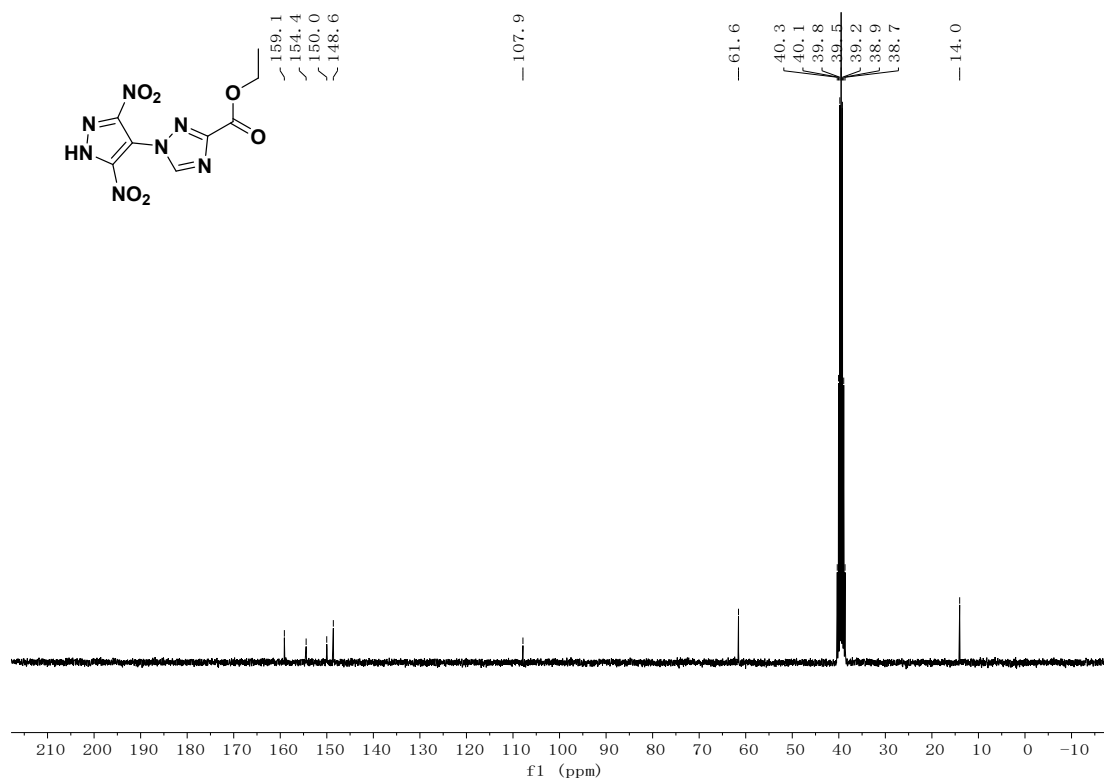

Fig. S6  $^{13}\text{C}$  NMR spectrum of **4a**.

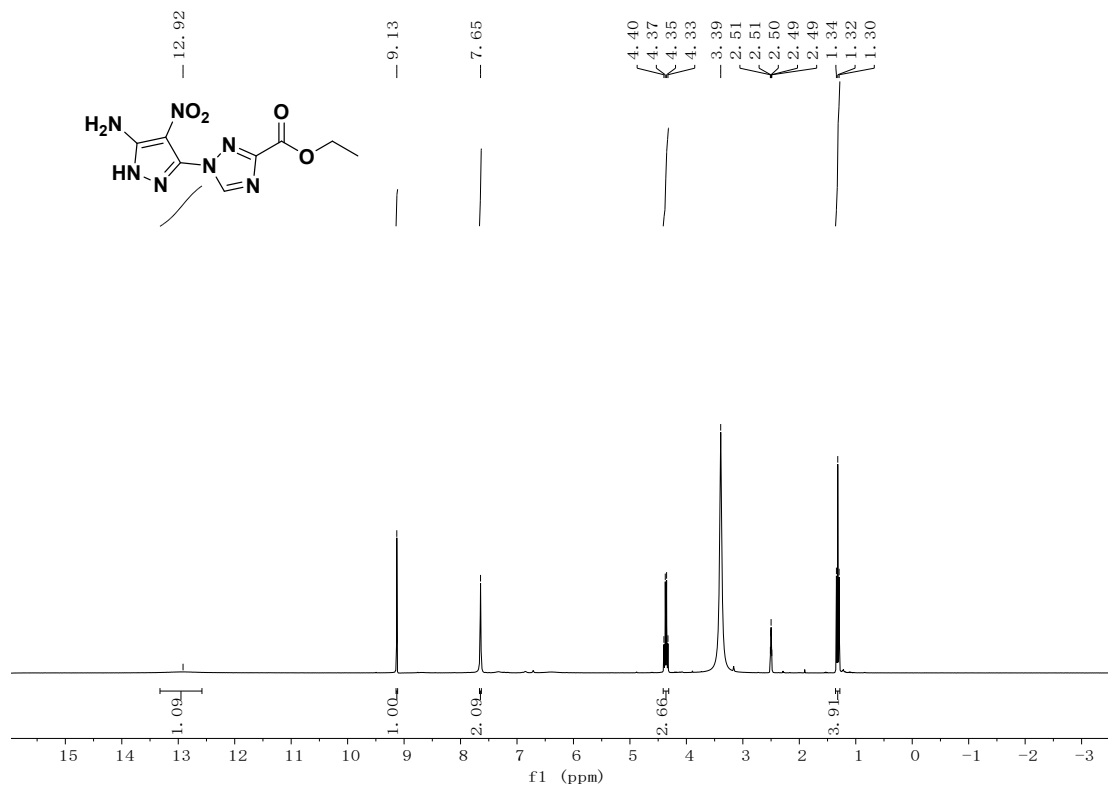

Fig. S7  $^1\text{H}$  NMR spectrum of **5a**.

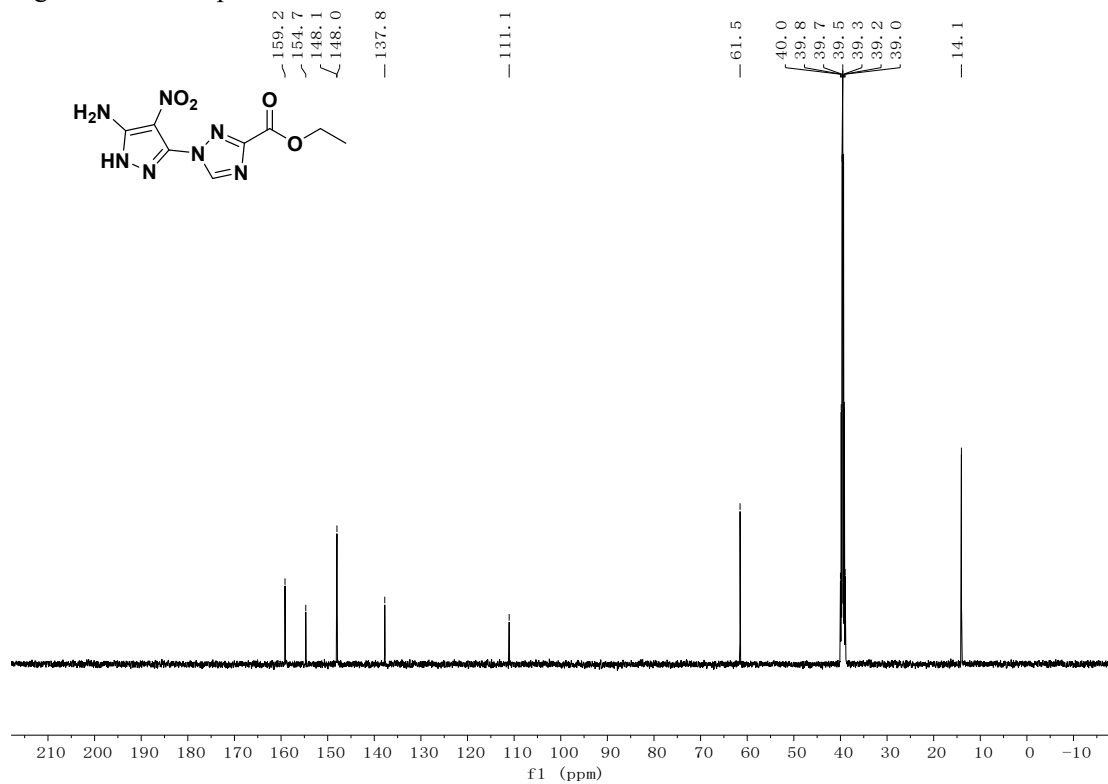

Fig. S8  $^{13}\text{C}$  NMR spectrum of **5a**.

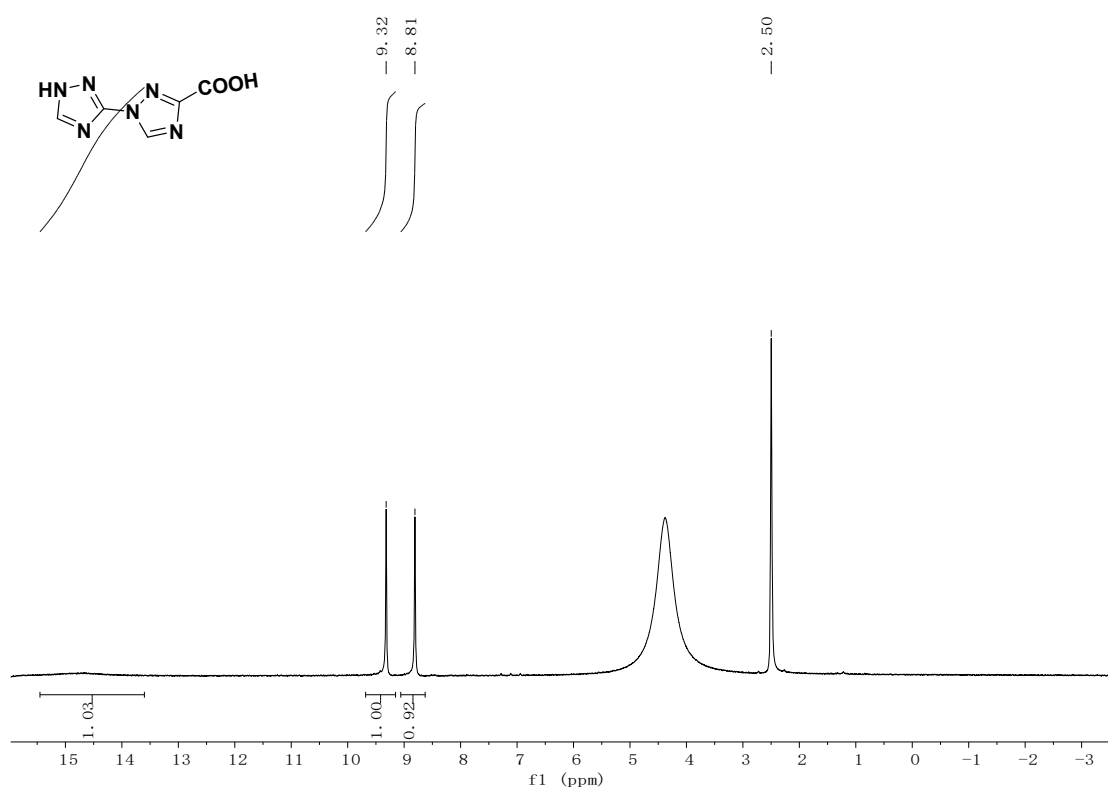

Fig. S9  $^1\text{H}$  NMR spectrum of **2b**.

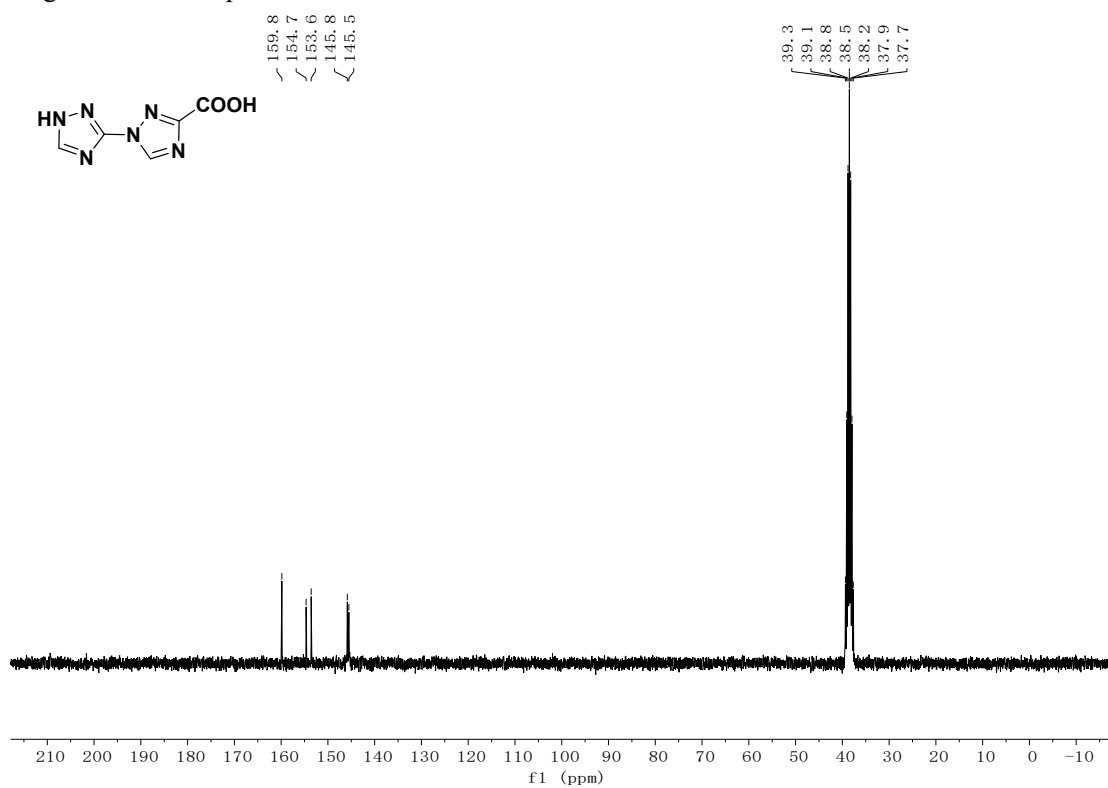

Fig. S10  $^{13}\text{C}$  NMR spectrum of **2b**.



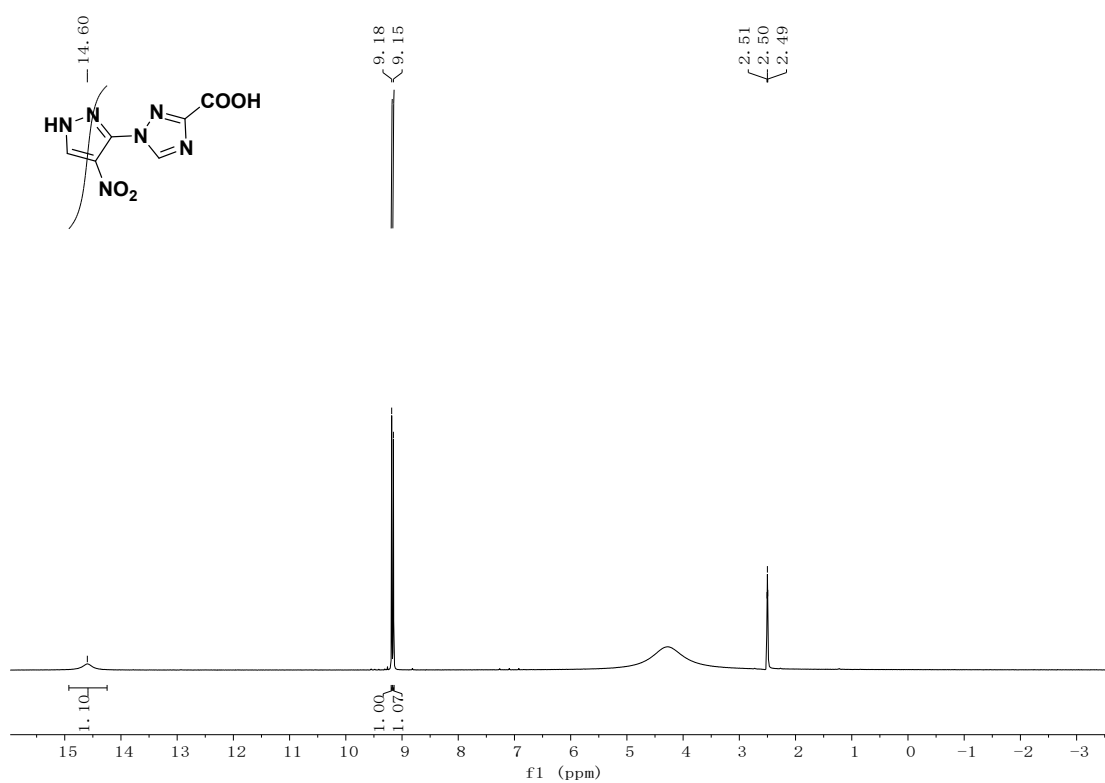

Fig. S11 <sup>1</sup>H NMR spectrum of **3b**.

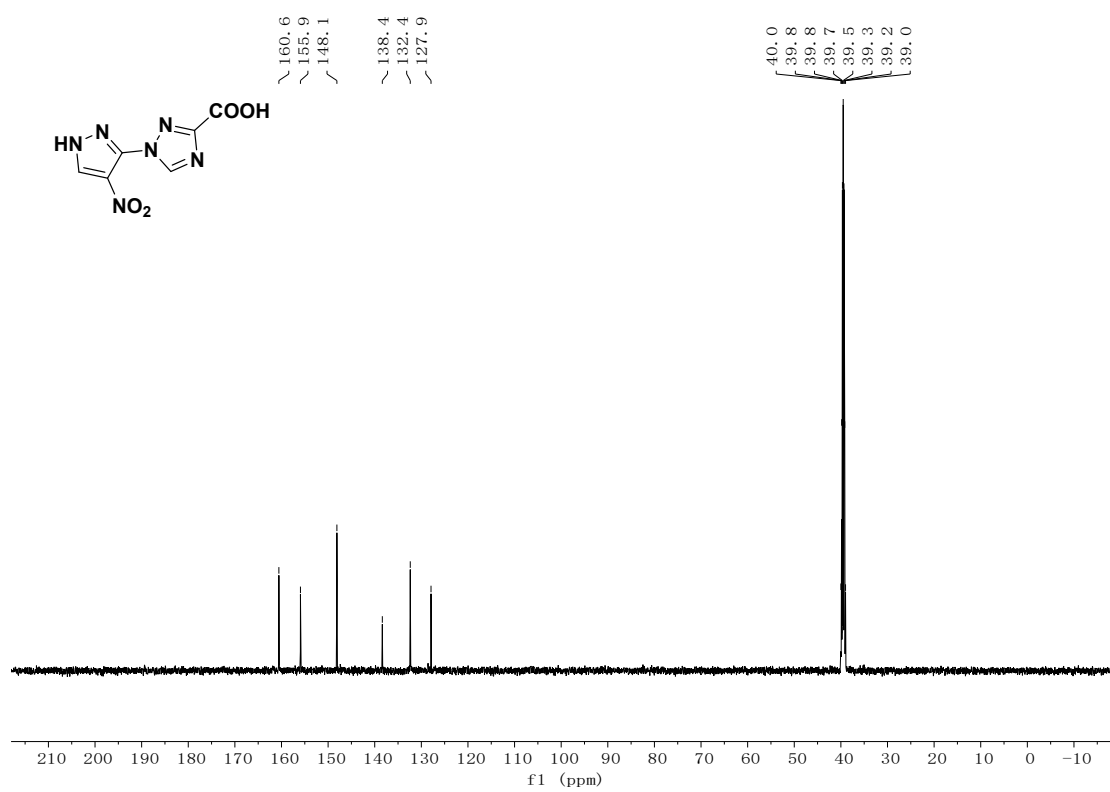

Fig. S12 <sup>13</sup>C NMR spectrum of **3b**.

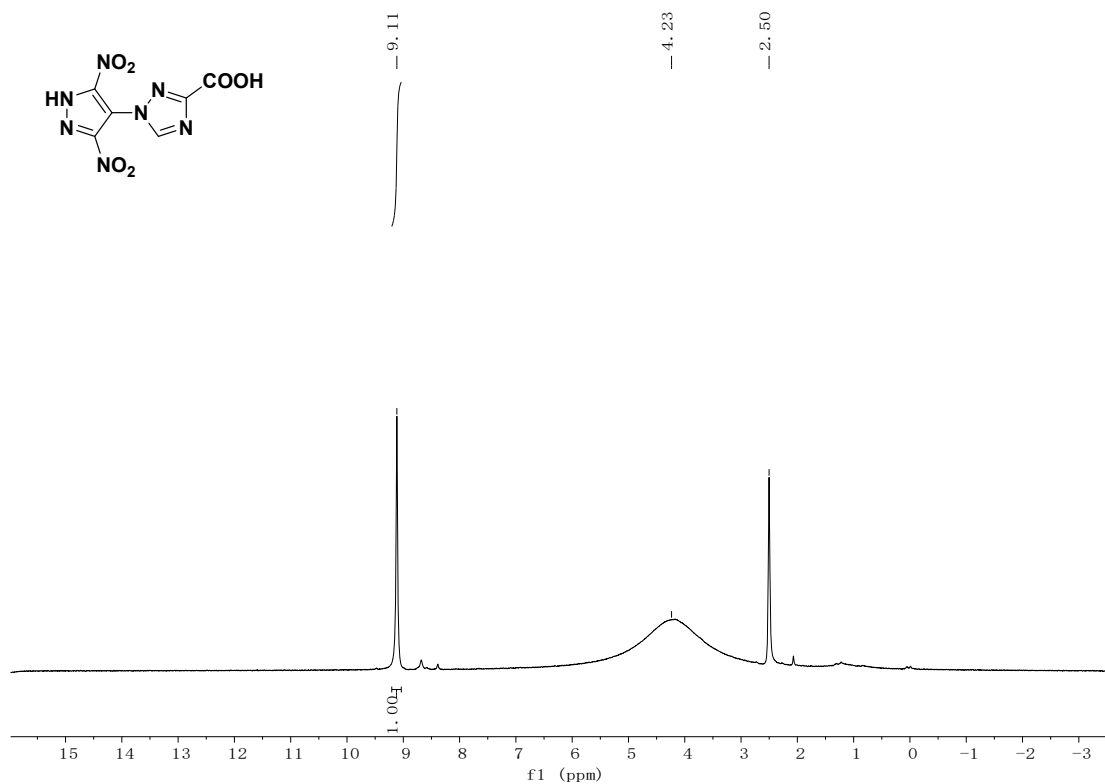

Fig. S13 <sup>1</sup>H NMR spectrum of **4b**.

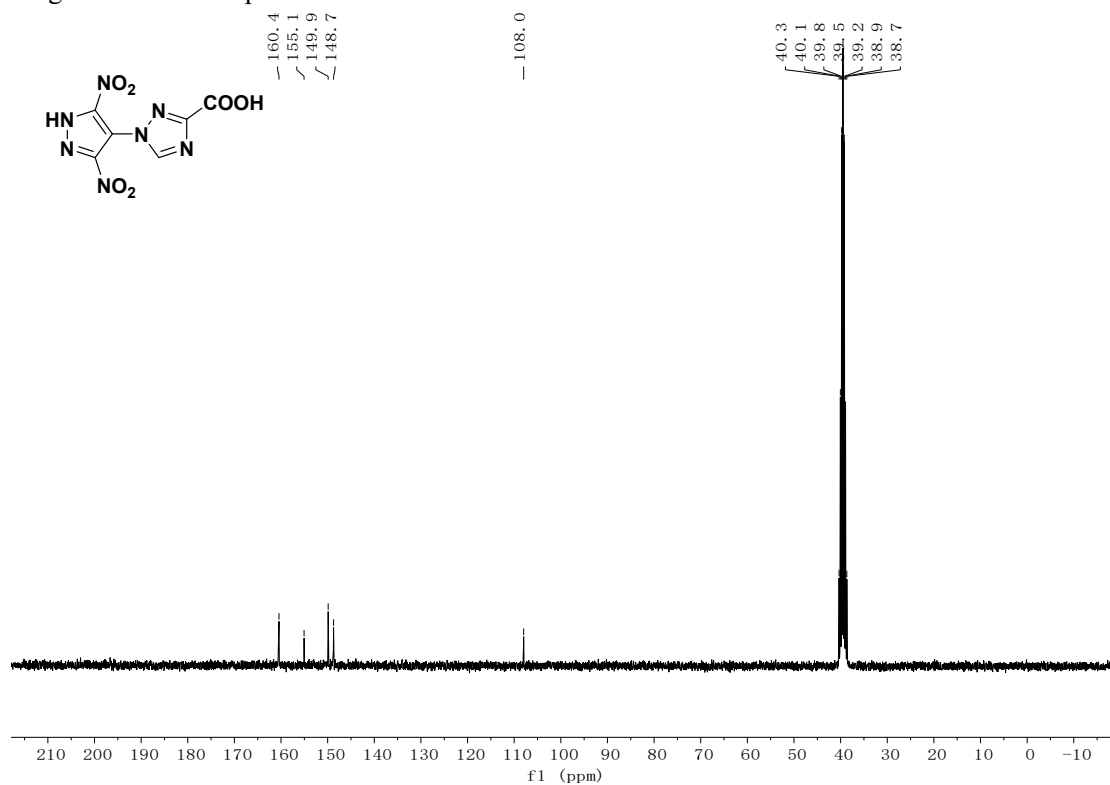

Fig. S14 <sup>13</sup>C NMR spectrum of **4b**.

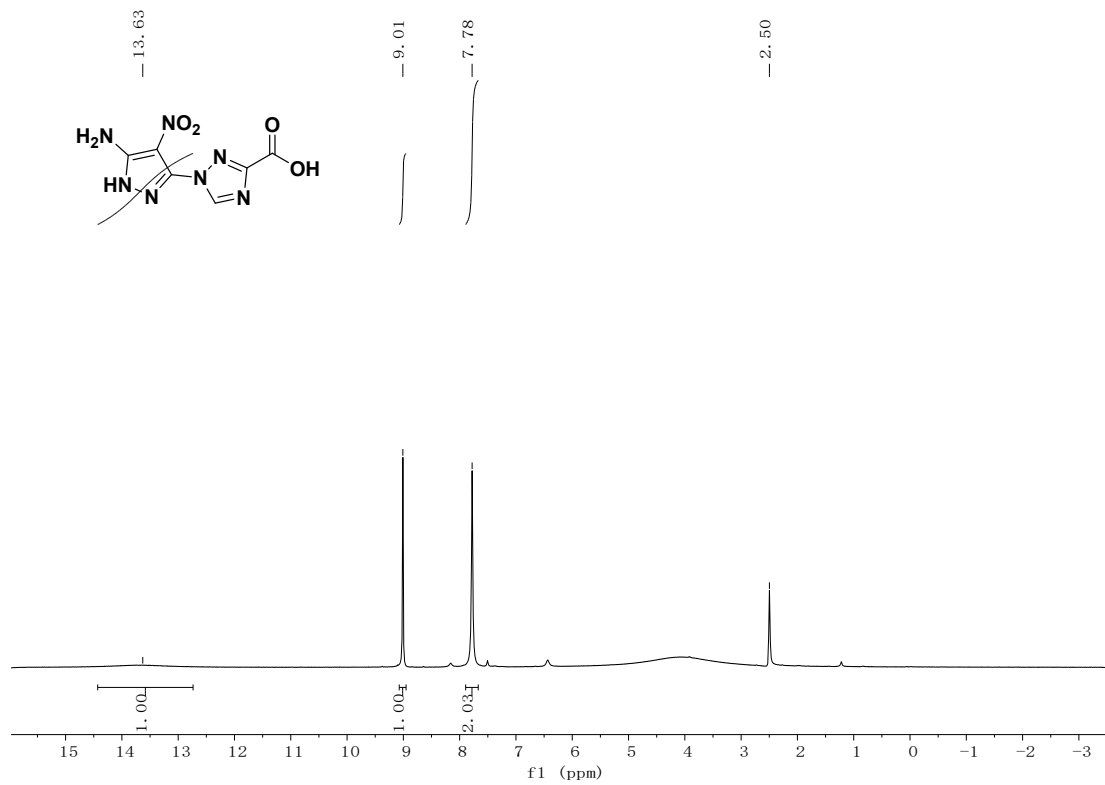

Fig. S15 <sup>1</sup>H NMR spectrum of **5b**.

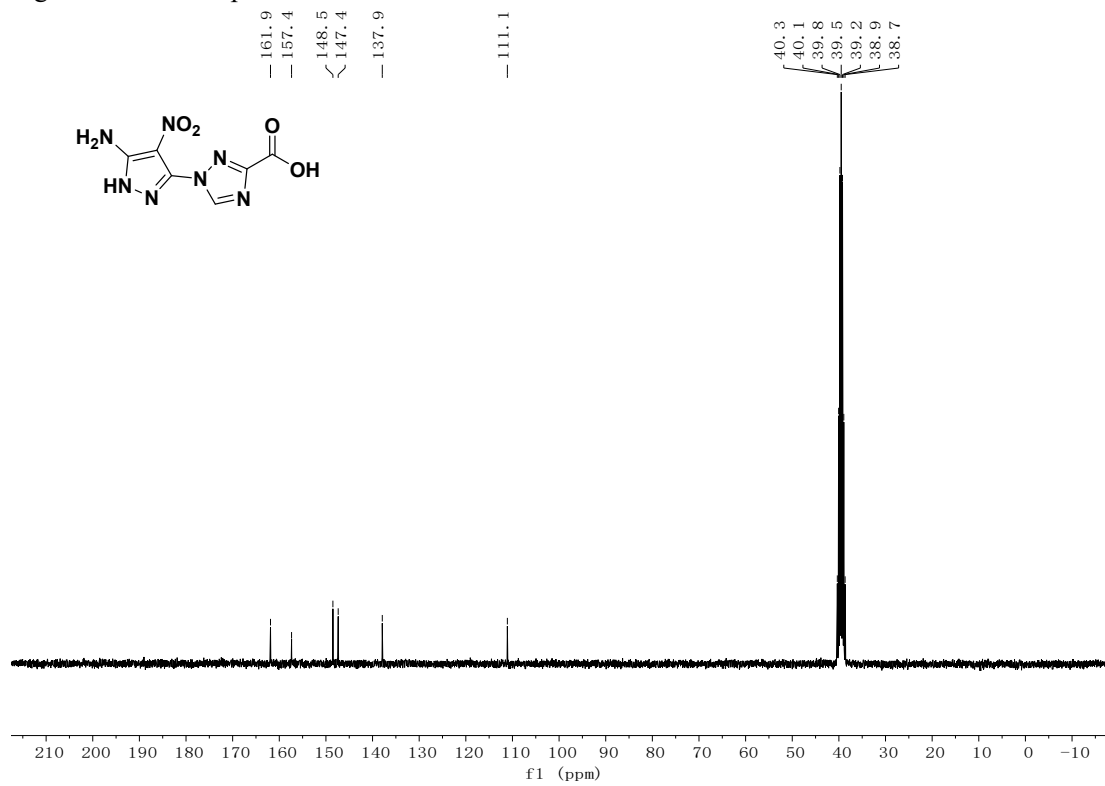

Fig. S16 <sup>13</sup>C NMR spectrum of **5b**.

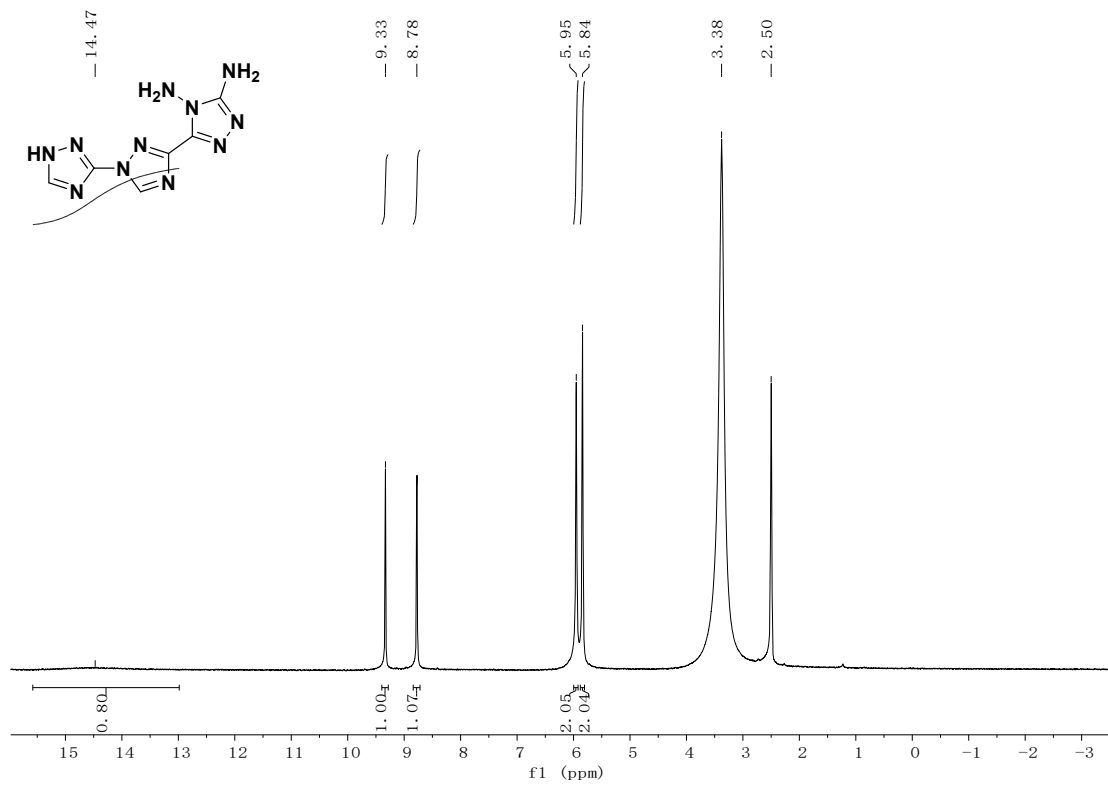

Fig. S17 <sup>1</sup>H NMR spectrum of **2c**.

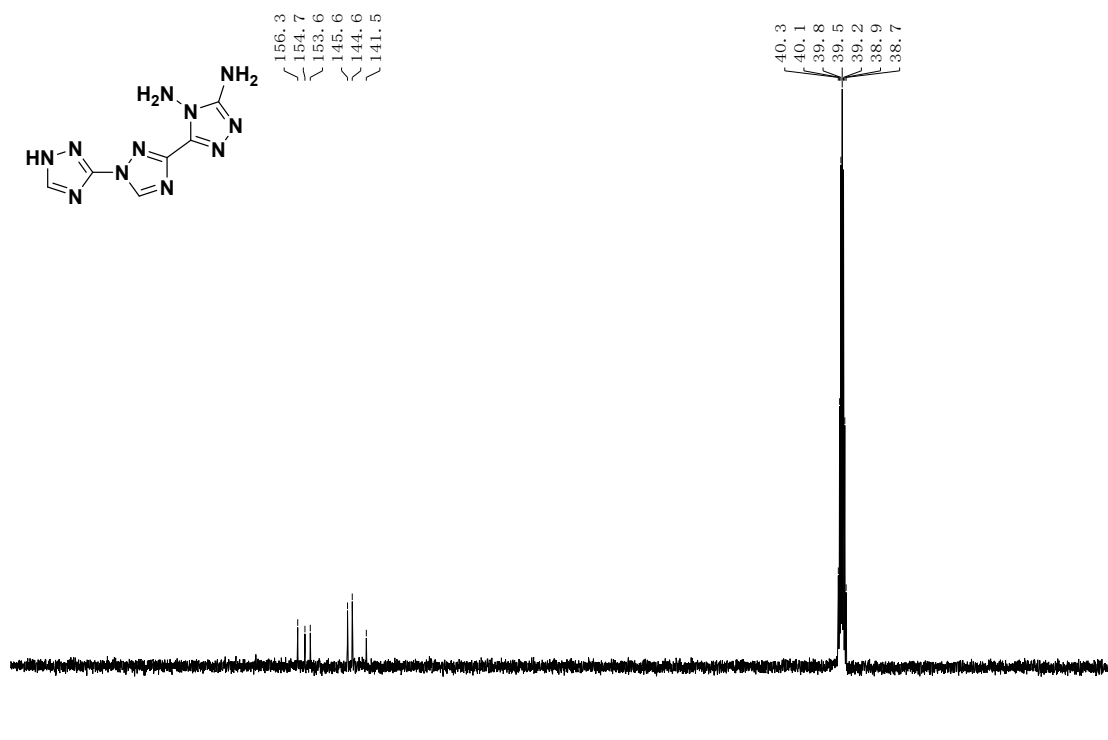

Fig. S18  $^{13}\text{C}$  NMR spectrum of **2c**.

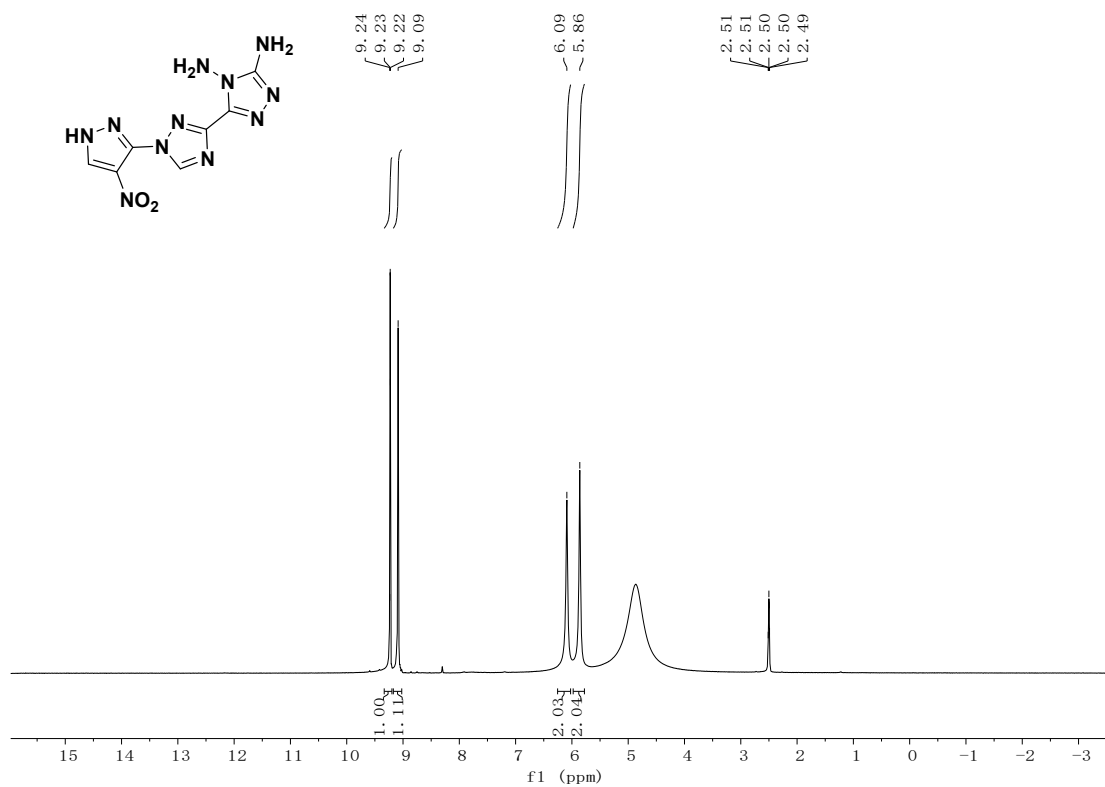

Fig. S19  $^1\text{H}$  NMR spectrum of **3c**.

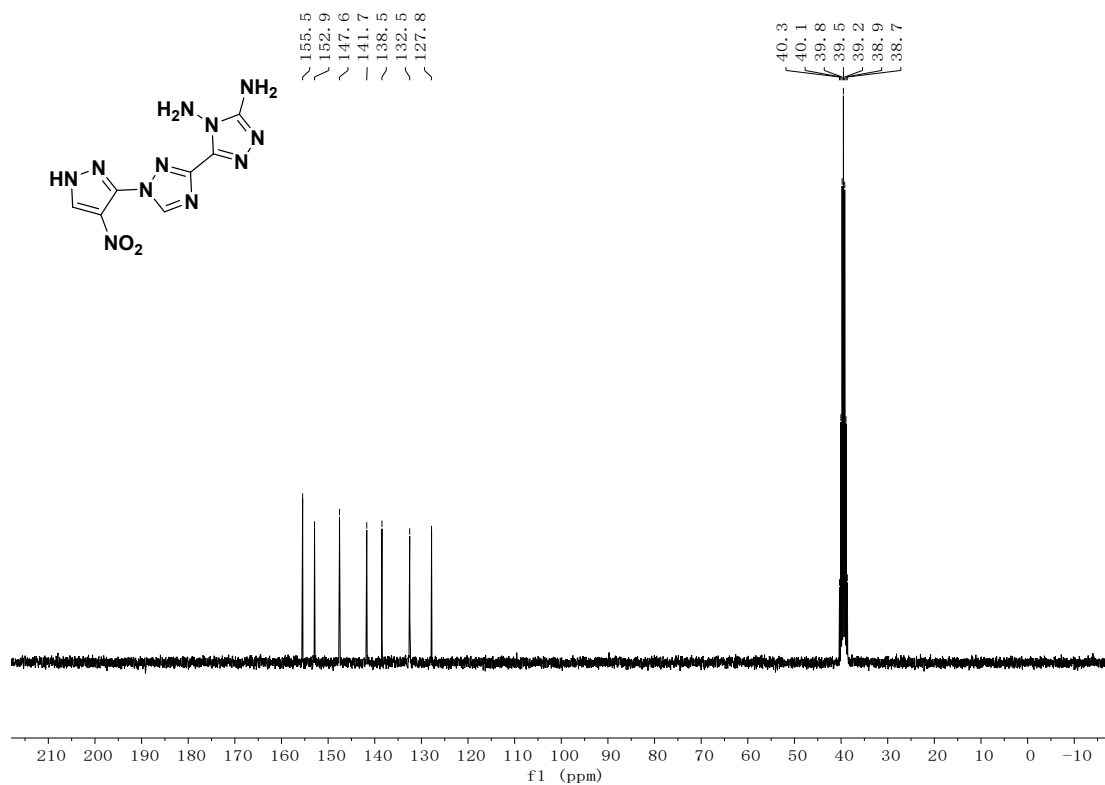

Fig. S20  $^{13}\text{C}$  NMR spectrum of **3c**.

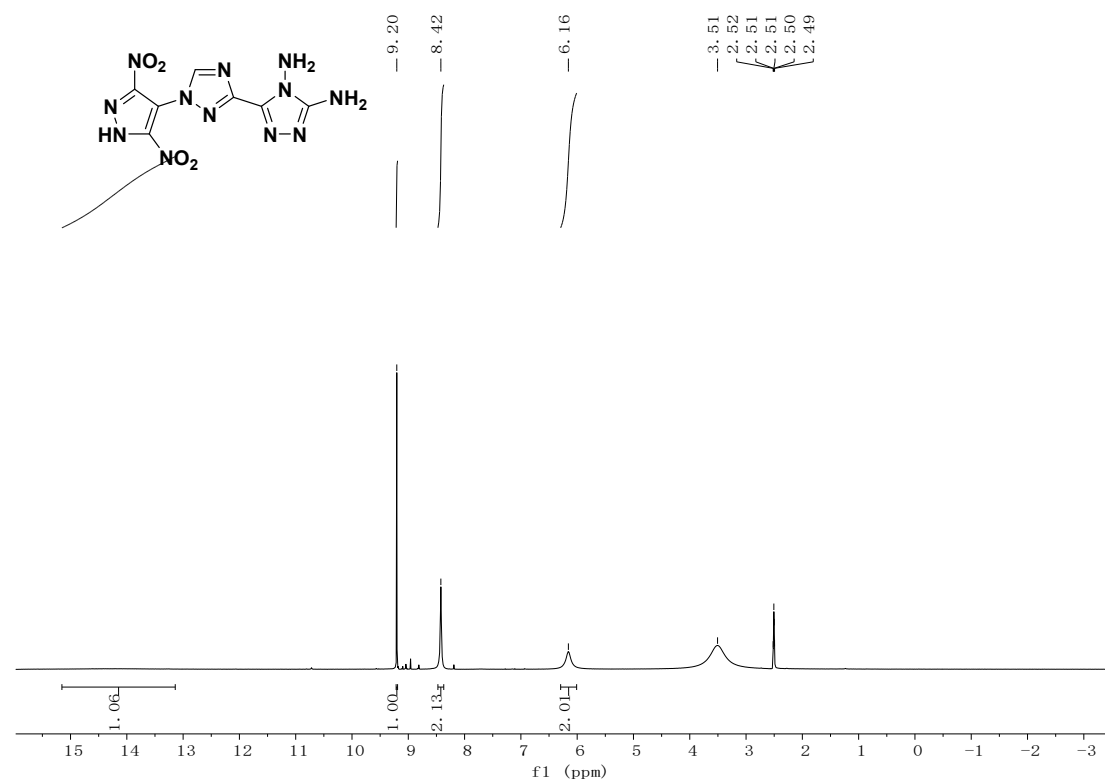

Fig. S21  $^1\text{H}$  NMR spectrum of **4c**.

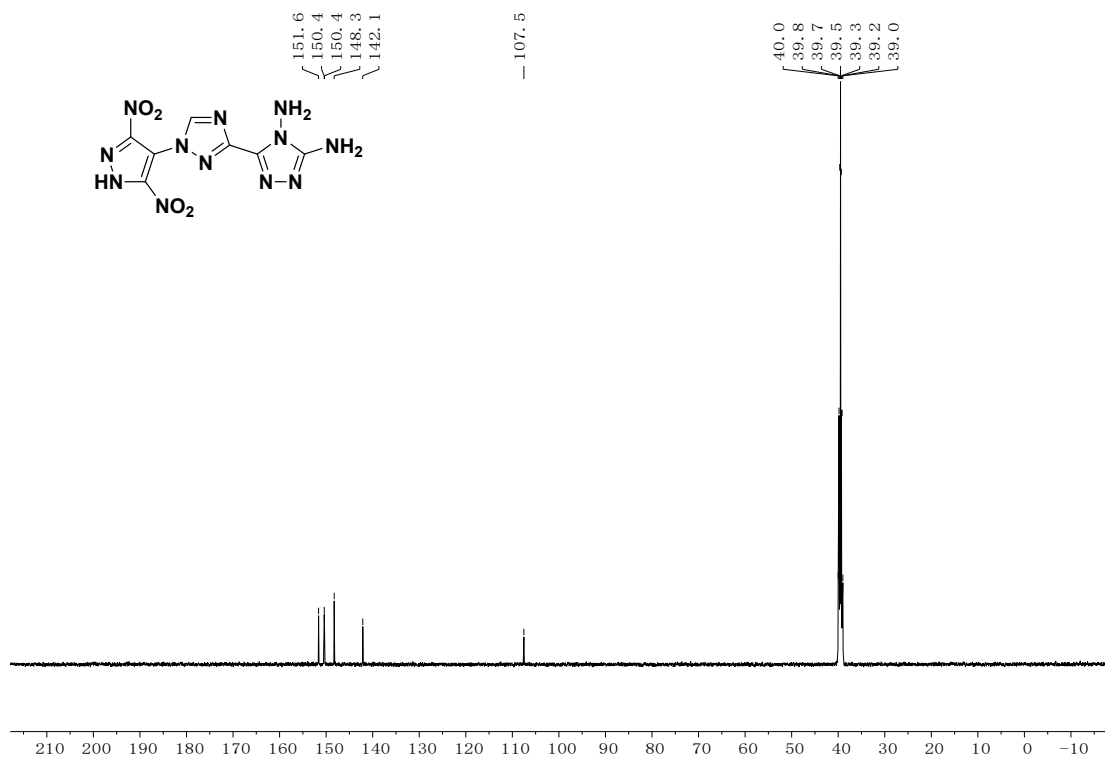

Fig. S22  $^{13}\text{C}$  NMR spectrum of **4c**.

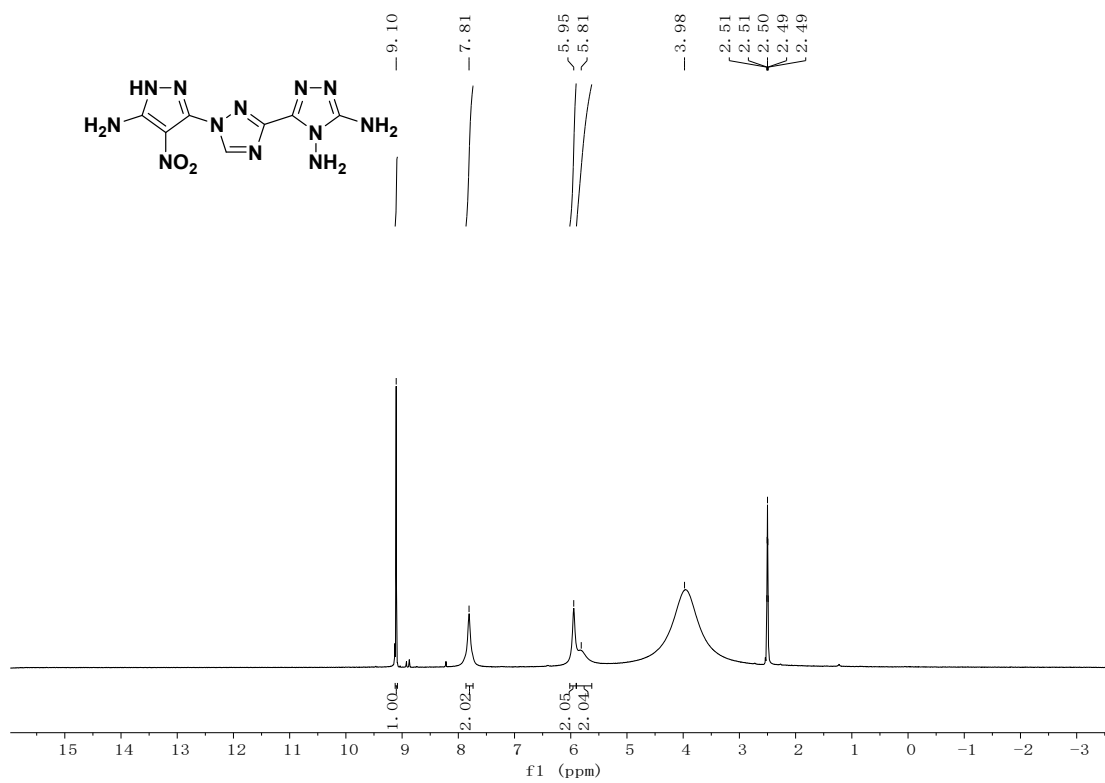

Fig. S23  $^1\text{H}$  NMR spectrum of **5c**.

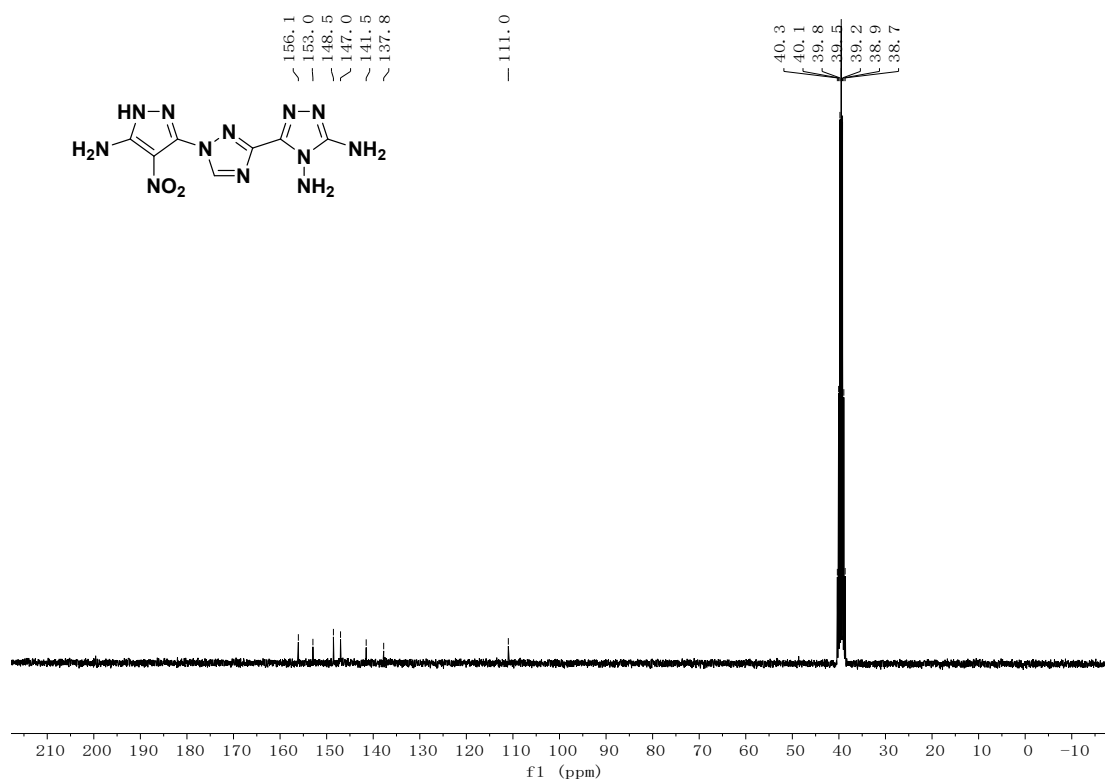

Fig. S24  $^{13}\text{C}$  NMR spectrum of **5c**.

## 5. The test of five-second (5s) delay exploding point

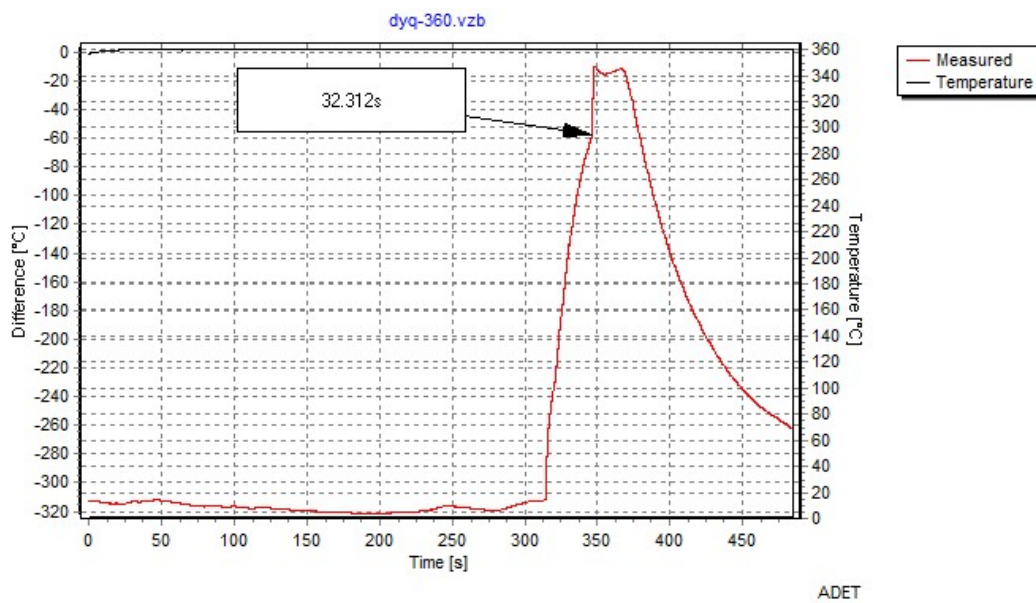



Fig. S25 The delay time of explosion of 4c at 360 ° C.

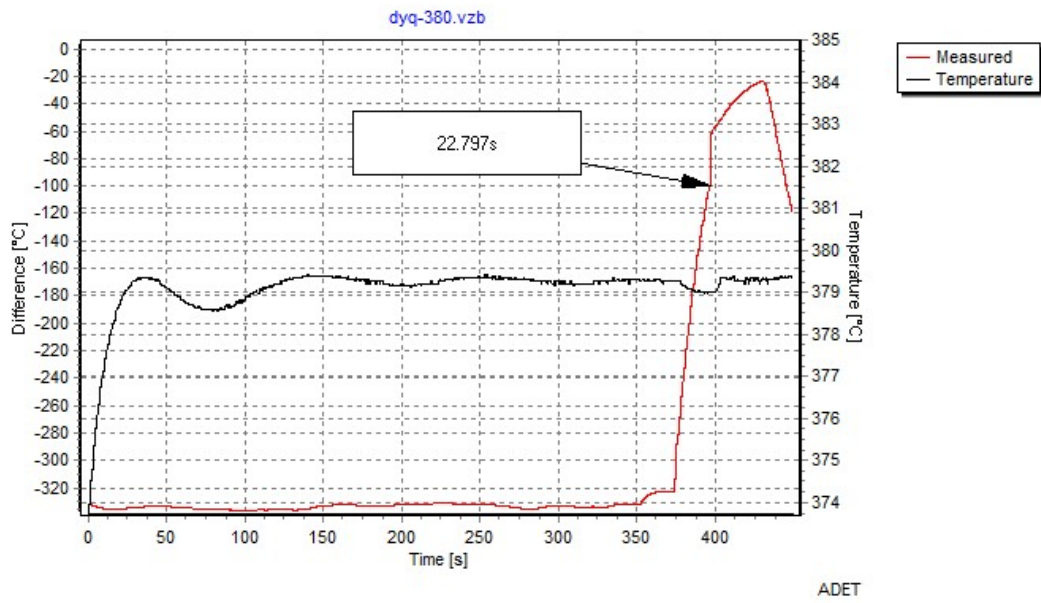

Fig. S26 The delay time of explosion of 4c at 380 ° C.

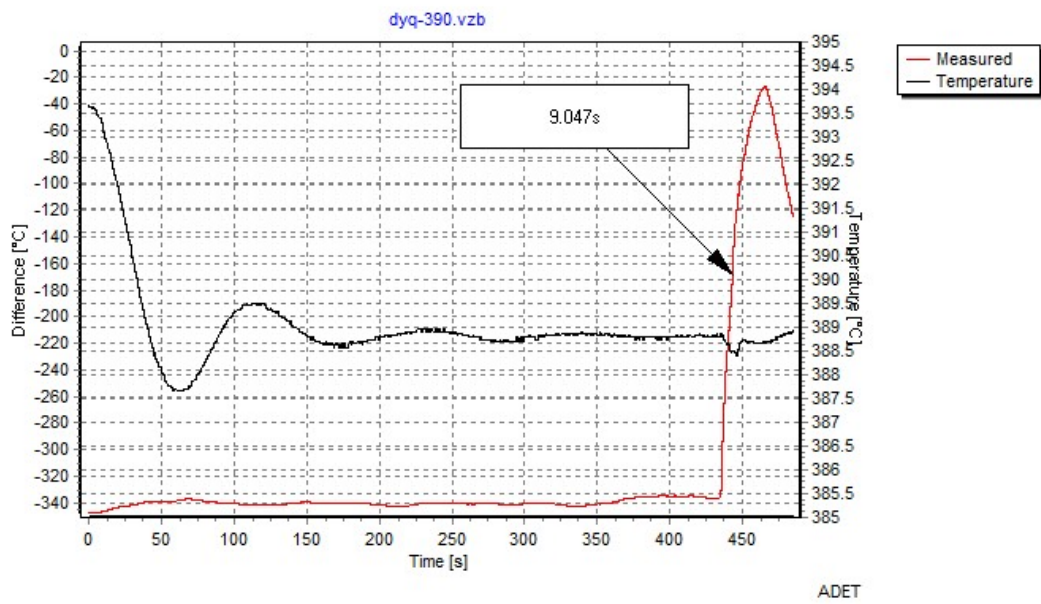

Fig. S27 The delay time of explosion of 4c at 390 ° C.

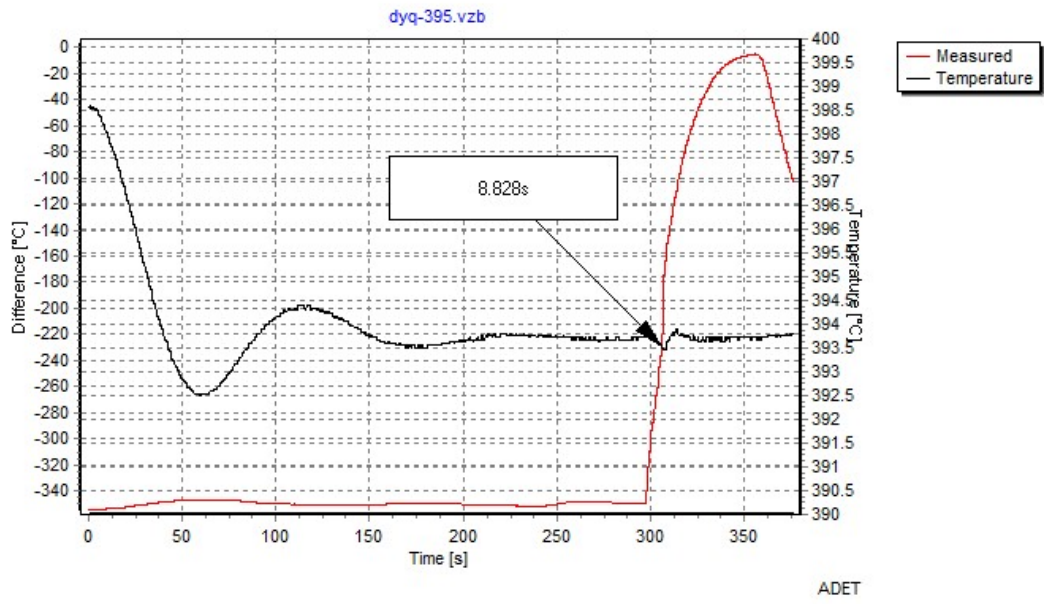

Fig. S28 The delay time of explosion of **4c** at 395 ° C.

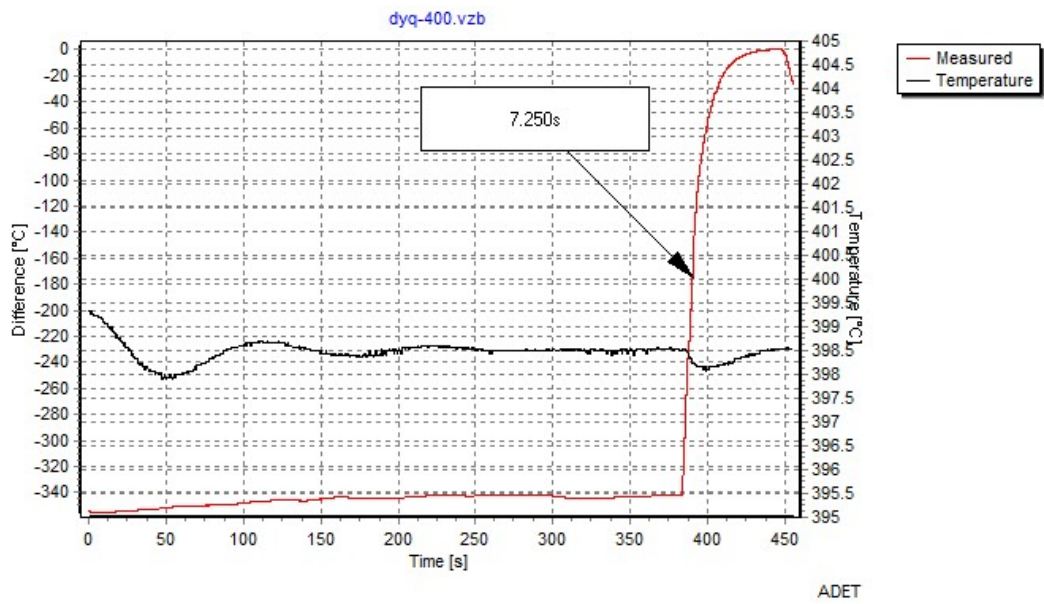

Fig. S29 The delay time of explosion of **4c** at 400 ° C.

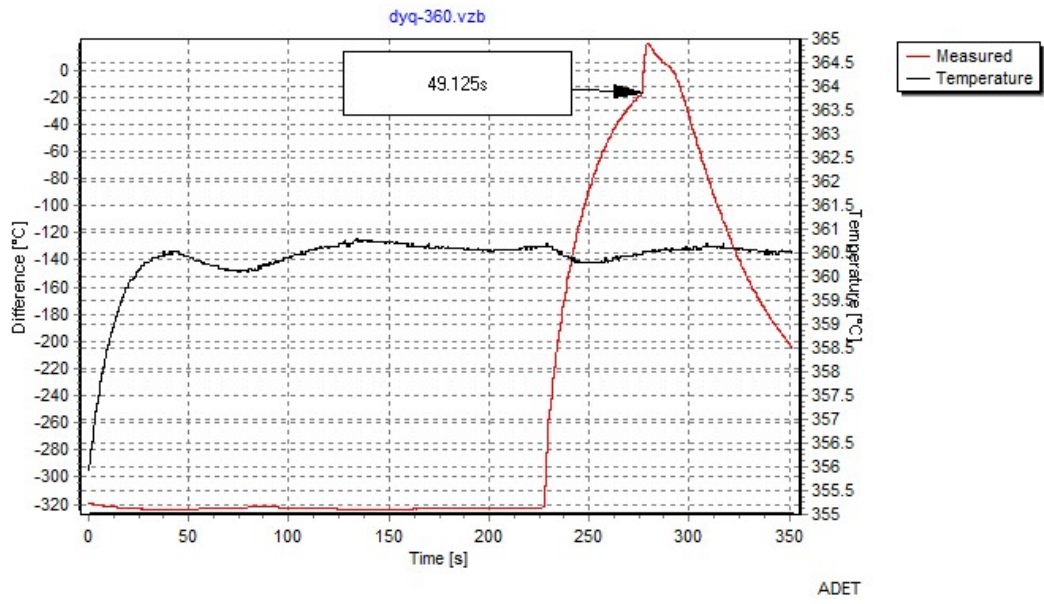

Fig. S30 The delay time of explosion of 5c at 360 ° C.

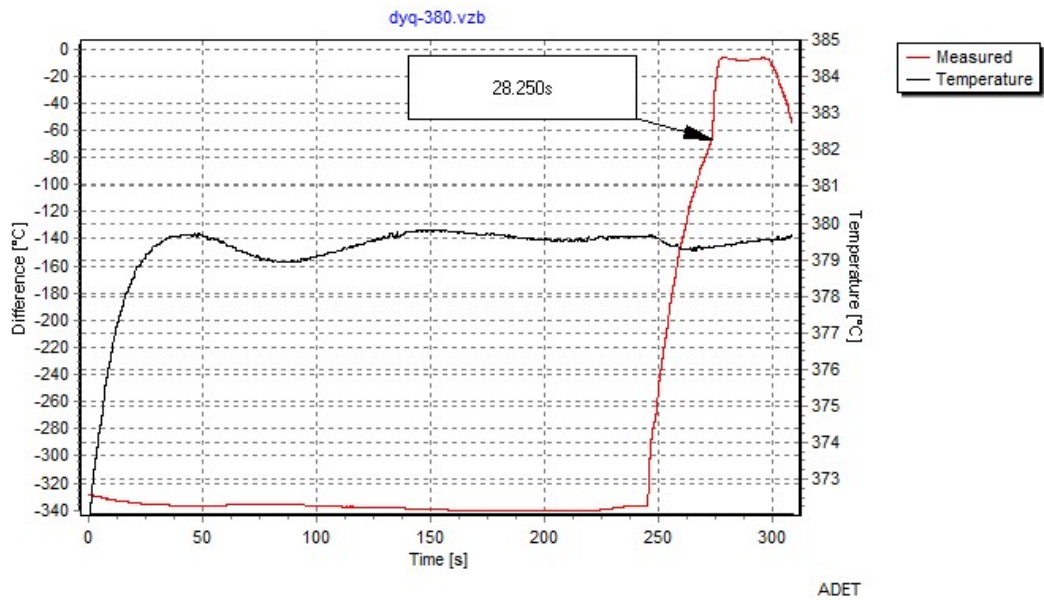

Fig. S31 The delay time of explosion of 5c 380 ° C.

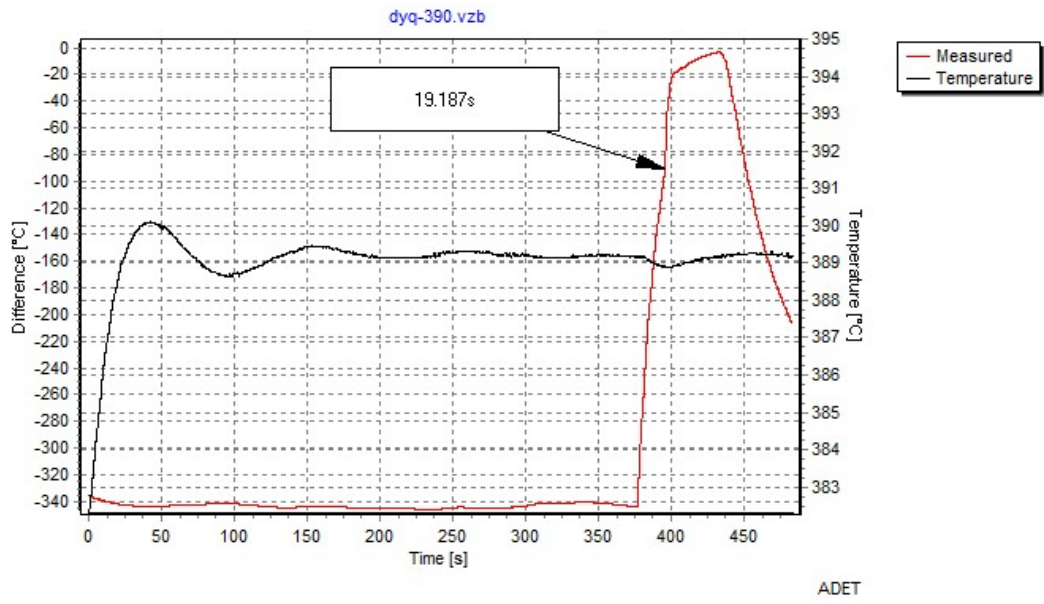

Fig. S32 The delay time of explosion of 5c at 390 ° C.

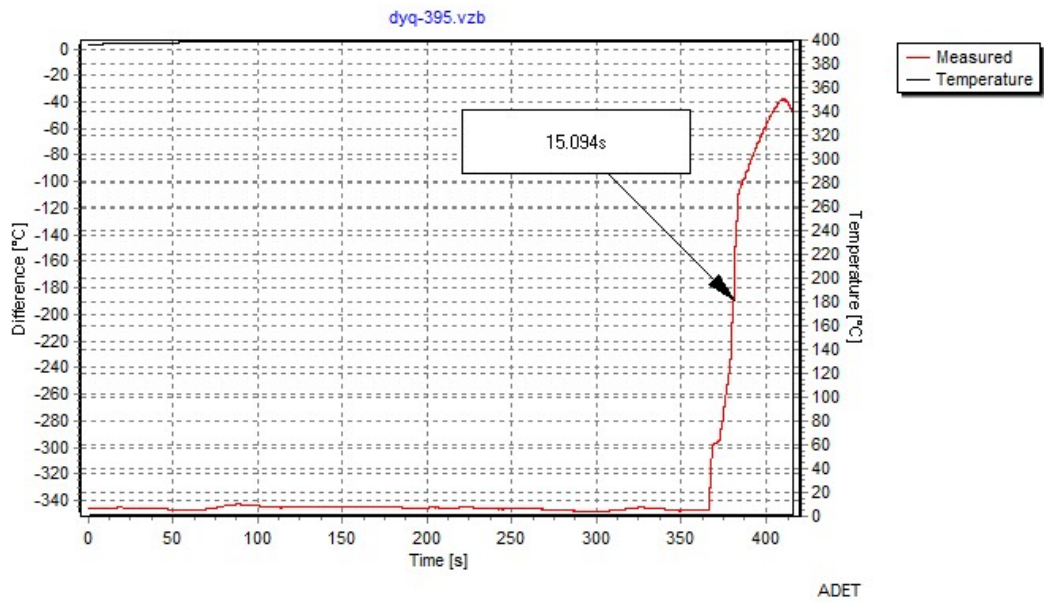

Fig. S33 The delay time of explosion of 5c 395 ° C.

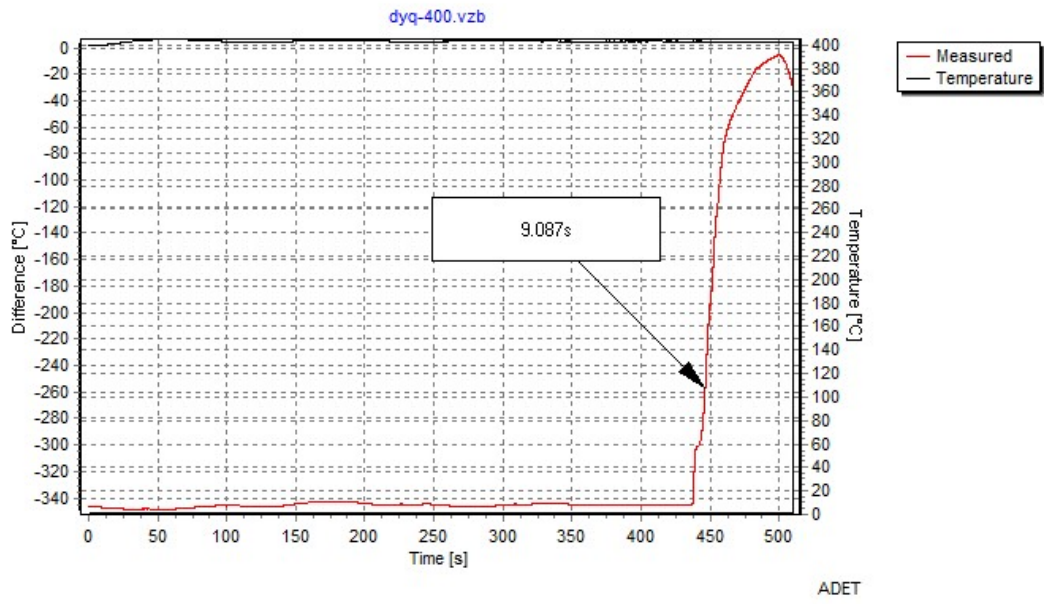

Fig. S34 The delay time of explosion of **5c** at 400 ° C.

## 6. DSC plots

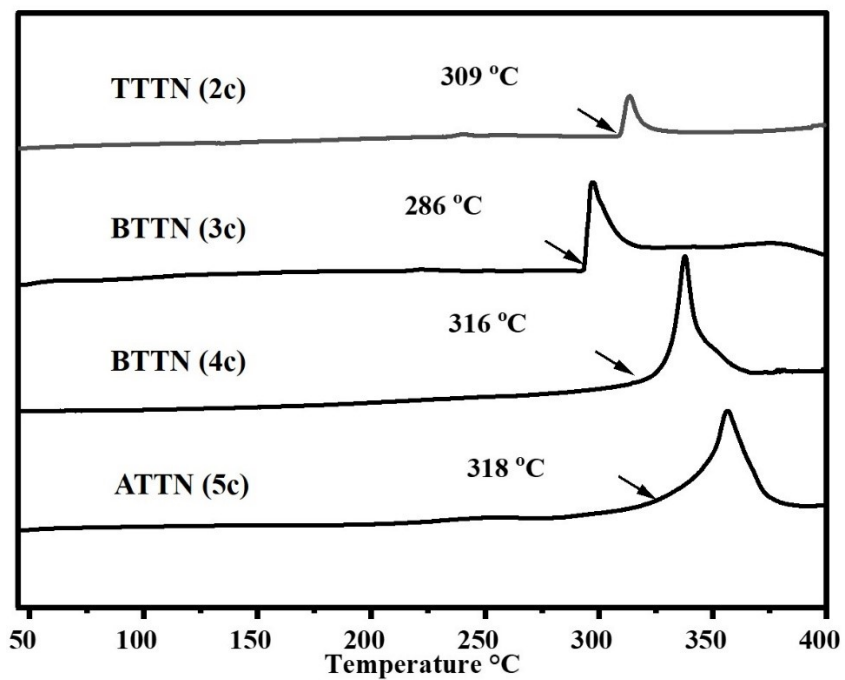

Fig. S35 DSC plots of TTTN (2c), BTTN (3c), DTTN (4c) and ATTN (5c)

### 7. The device image of the 5 s bursting point

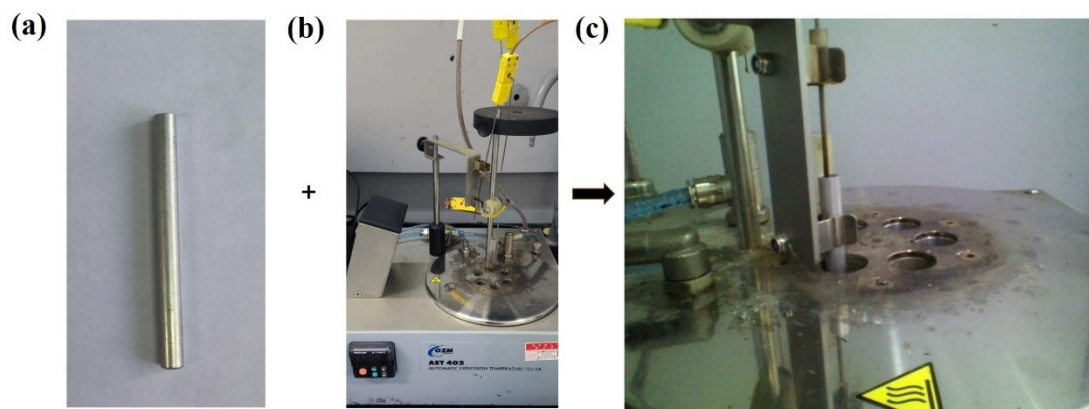

Fig. S36 (a) Aluminum tube for holding samples; (b) Heating module; (c) Diagram of the device before the sample was decomposed
